# Supplementary material for: Patient-Derived Xenografts of High-Grade Serous Ovarian Cancer Subtype as a Powerful Tool in Pre-Clinical Research
Source: MDPI journal article supplement (doi:10.3390/cancers13246288), 2021-12-15
Supplement: s1 [file s1]

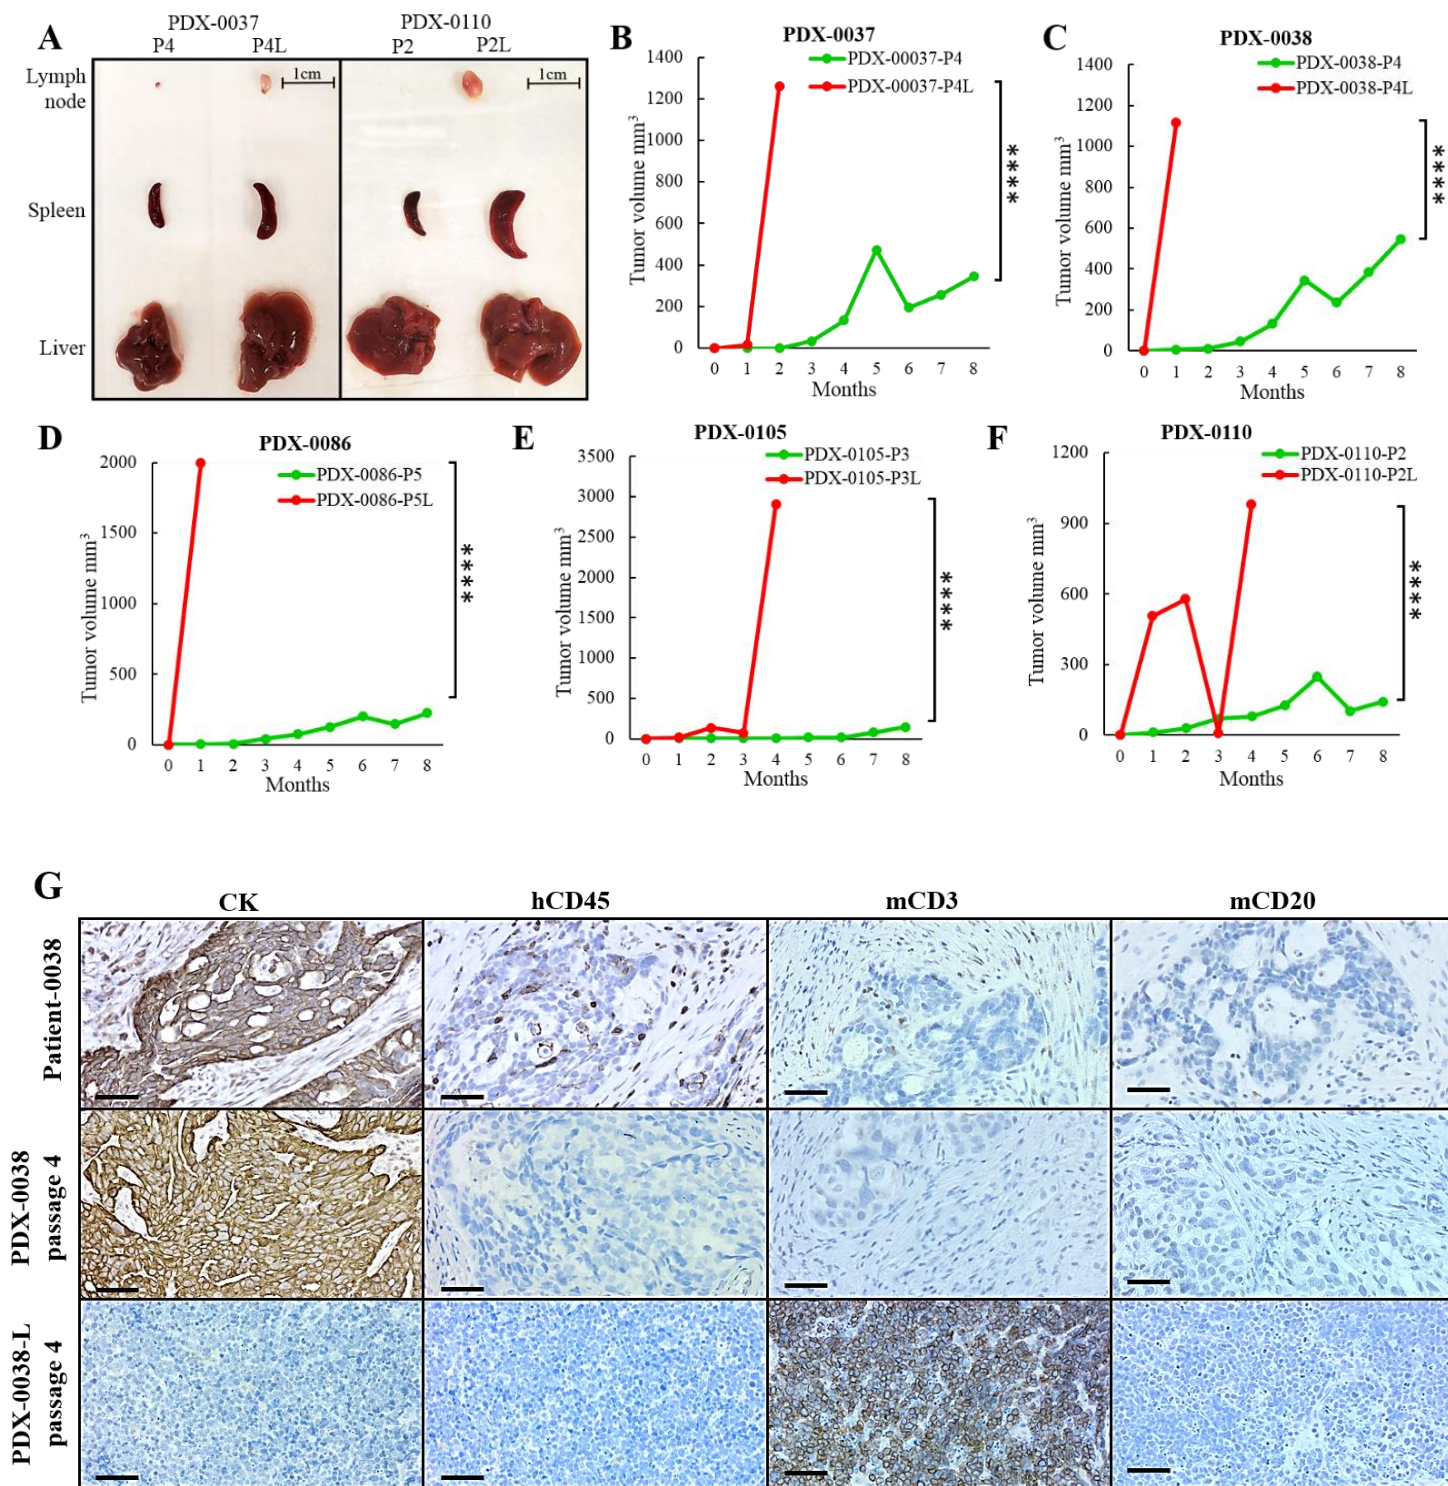



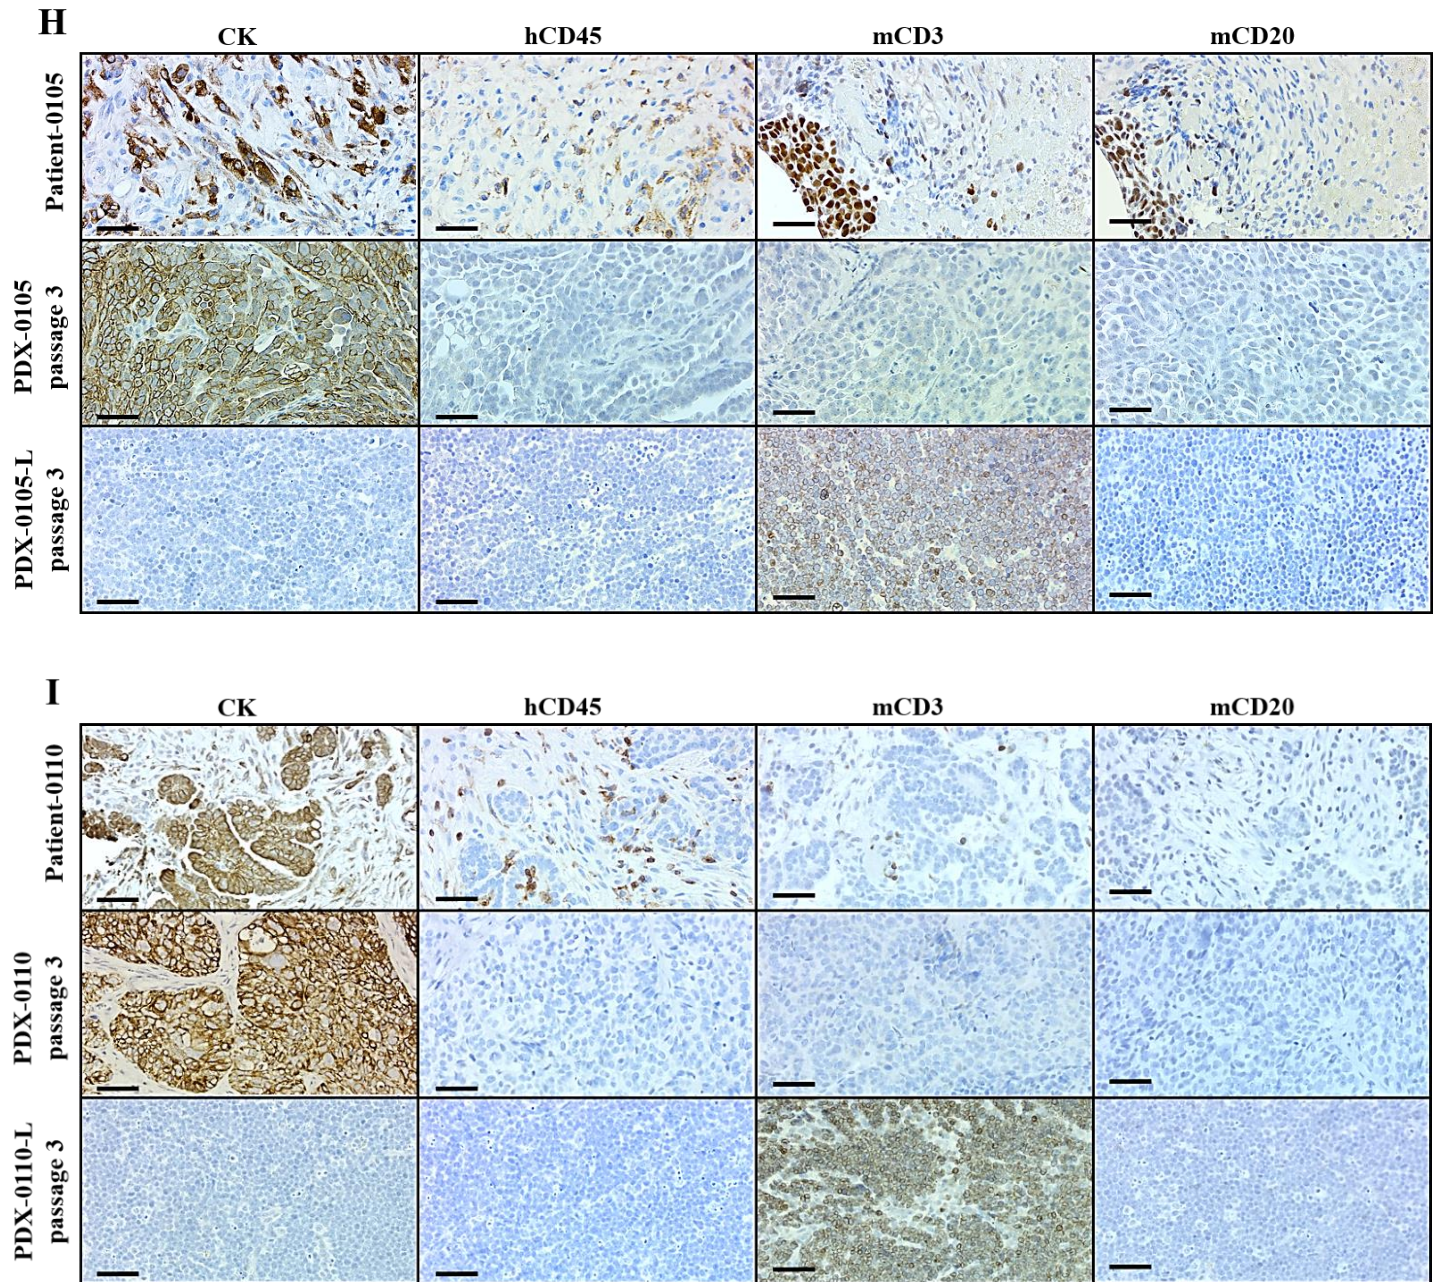

**Figure S1. Lymphoma transformation in PDX tumor models.** (A) Representative photographs of organs collected from lymphoma affected mouse vs. healthy control. Macroscopic analysis of lymphoma bearing mouse revealed splenomegaly, enlarged liver and lymph nodes. (B-F) Graphs represent tumor growth rate of PDXs with and without lymphoma contamination in NOD/scid mice (one way ANOVA, \*\*\*\* =  $p < 0.0001$ ). (G-I) Representative sections of lymphoma contaminated PDXs compared with original patient tumor and the non-affected PDX model (L = lymphoma contaminated). Tumor sections were evaluated by IHC for CK, hCD45, CD3 and CD20 expression. Scale bars represents 50  $\mu\text{m}$ .

A

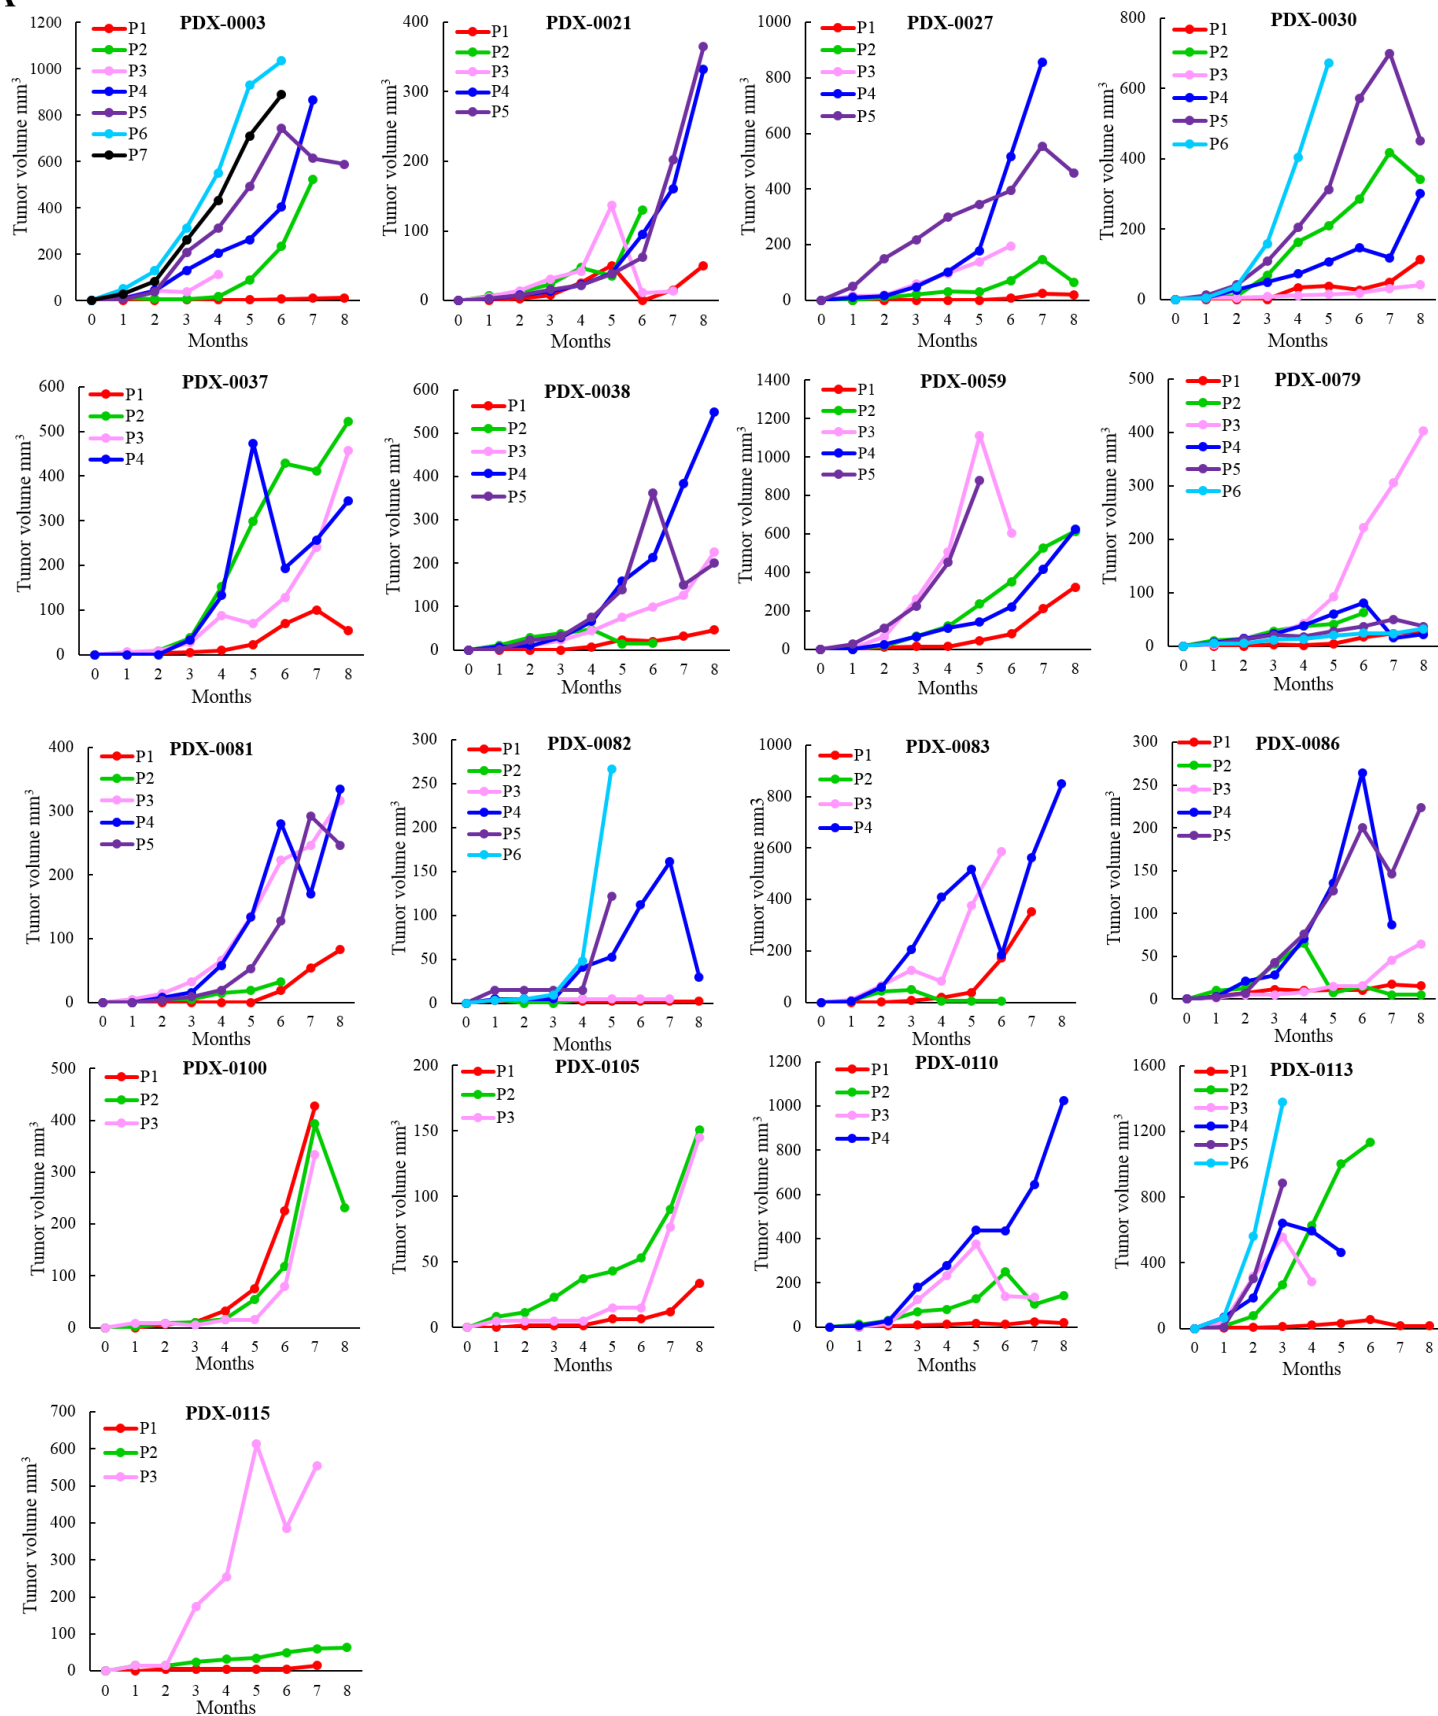



**B** Time in months required to reach 100 mm<sup>3</sup> tumor volume of each passage of respective PDX.

| PDX-0003 | PDX-0021 | PDX-0027 | PDX-0030 | PDX-0037 | PDX-0038 | PDX-0059 | PDX-0079 | PDX-0081 | PDX-0082 | PDX-0083 | PDX-0086 | PDX-0100 | PDX-0105 | PDX-0110 | PDX-0113 | PDX-0115 |
|----------|----------|----------|----------|----------|----------|----------|----------|----------|----------|----------|----------|----------|----------|----------|----------|----------|
| P1 8.0   | P1 6.5   | P1 9.5   | P1 8.3   | P1 7.5   | P1 9.2   | P1 7.7   | P1 9.6   | P1 7.8   | P1 10.0  | P1 4.0   | P1 8.5   | P1 6.8   | P1 8.0   | P1 9.8   | P1 6.8   | P1 8.5   |
| P2 5.3   | P2 5.0   | P2 6.9   | P2 3.9   | P2 4.5   | P2 4.0   | P2 4.3   | P2 8.0   | P2 6.5   | P2 8.0   | P2 3.9   | P2 5.5   | P2 5.5   | P2 7.5   | P2 4.1   | P2 2.5   | P2 9.5   |
| P3 3.0   | P3 5.7   | P3 4.0   | P3 9.5   | P3 5.4   | P3 6.6   | P3 2.7   | P3 4.2   | P3 6.0   | P3 8.0   | P3 2.7   | P3 8.0   | P3 5.5   | P3 7.0   | P3 3.5   | P3 1.9   | P3 3.6   |
| P4 3.0   | P4 6.4   | P4 4.3   | P4 5.8   | P4 5.0   | P4 4.8   | P4 4.4   | P4 6.8   | P4 5.2   | P4 6.0   | P4 3.1   | P4 4.7   |          |          | P4 3.0   | P4 1.7   |          |
| P5 2.7   | P5 6.8   | P5 2.8   | P5 3.3   |          | P5 4.8   | P5 2.2   | P5 7.8   | P5 6.8   | P5 5.0   |          | P5 3.8   |          |          |          | P5 1.7   |          |
| P6 2.1   |          |          | P6 3.2   |          |          |          | P6 8.0   |          | P6 4.8   |          |          |          |          |          | P6 1.3   |          |
| P7 3.3   |          |          |          |          |          |          |          |          |          |          |          |          |          |          |          |          |

**C** The latency time to develop a 100 mm<sup>3</sup> tumor

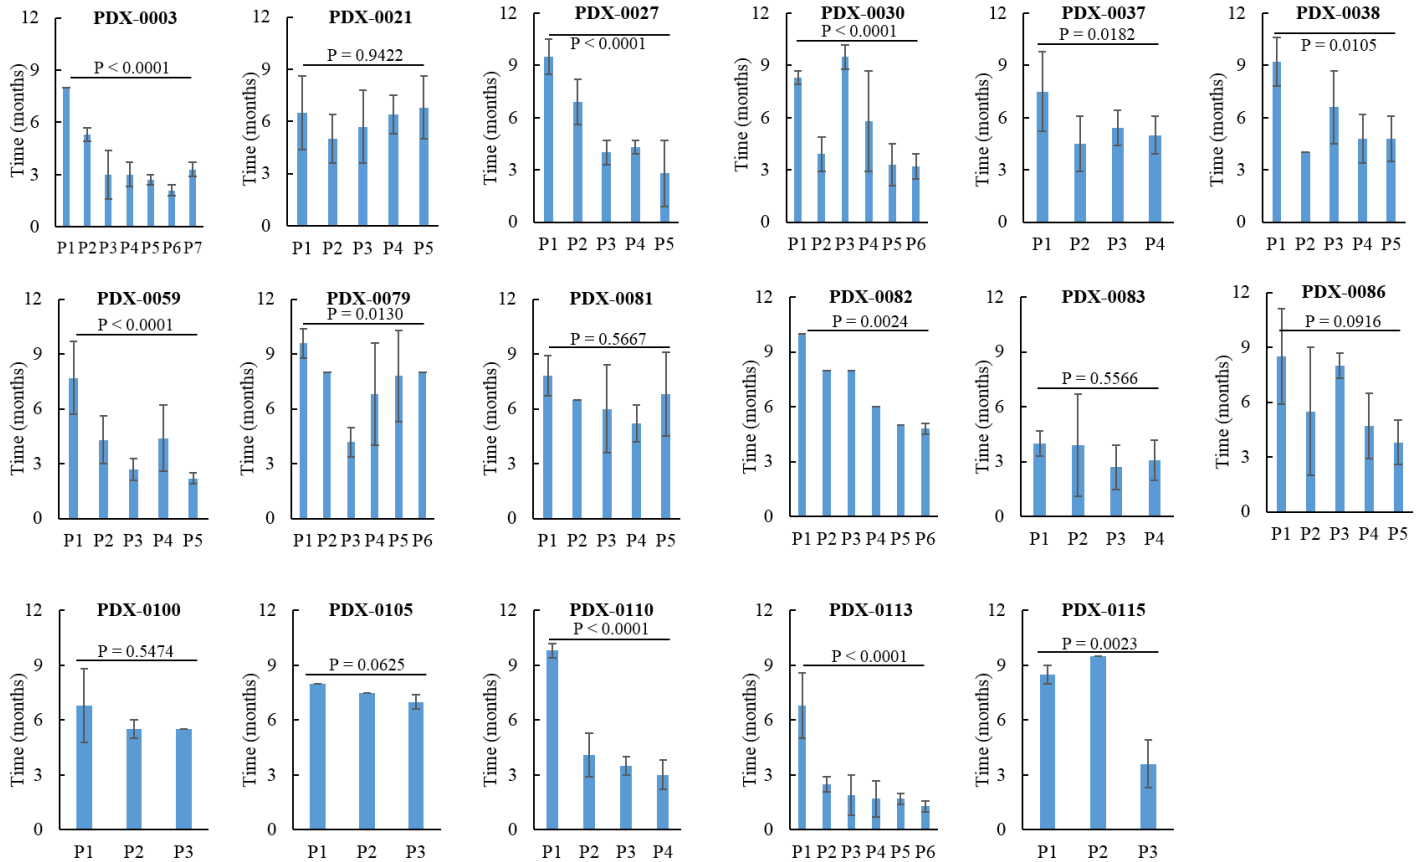

**Figure S2. Analysis of PDX tumors growth rates.** (A) Analysis of tumor growth rates of 17 PDX models across multiple *in vivo* passages. Graphs show growth rates of individual passages within each HGSOX PDX model. (B-C) Data presented in table (B) and graphs (C) illustrate the latency time to develop a palpable tumor (~100 mm<sup>3</sup> volume) from the time of initial implantation of each passage of every PDX line in this study. Data are represented as mean  $\pm$  SEM (one way ANOVA).



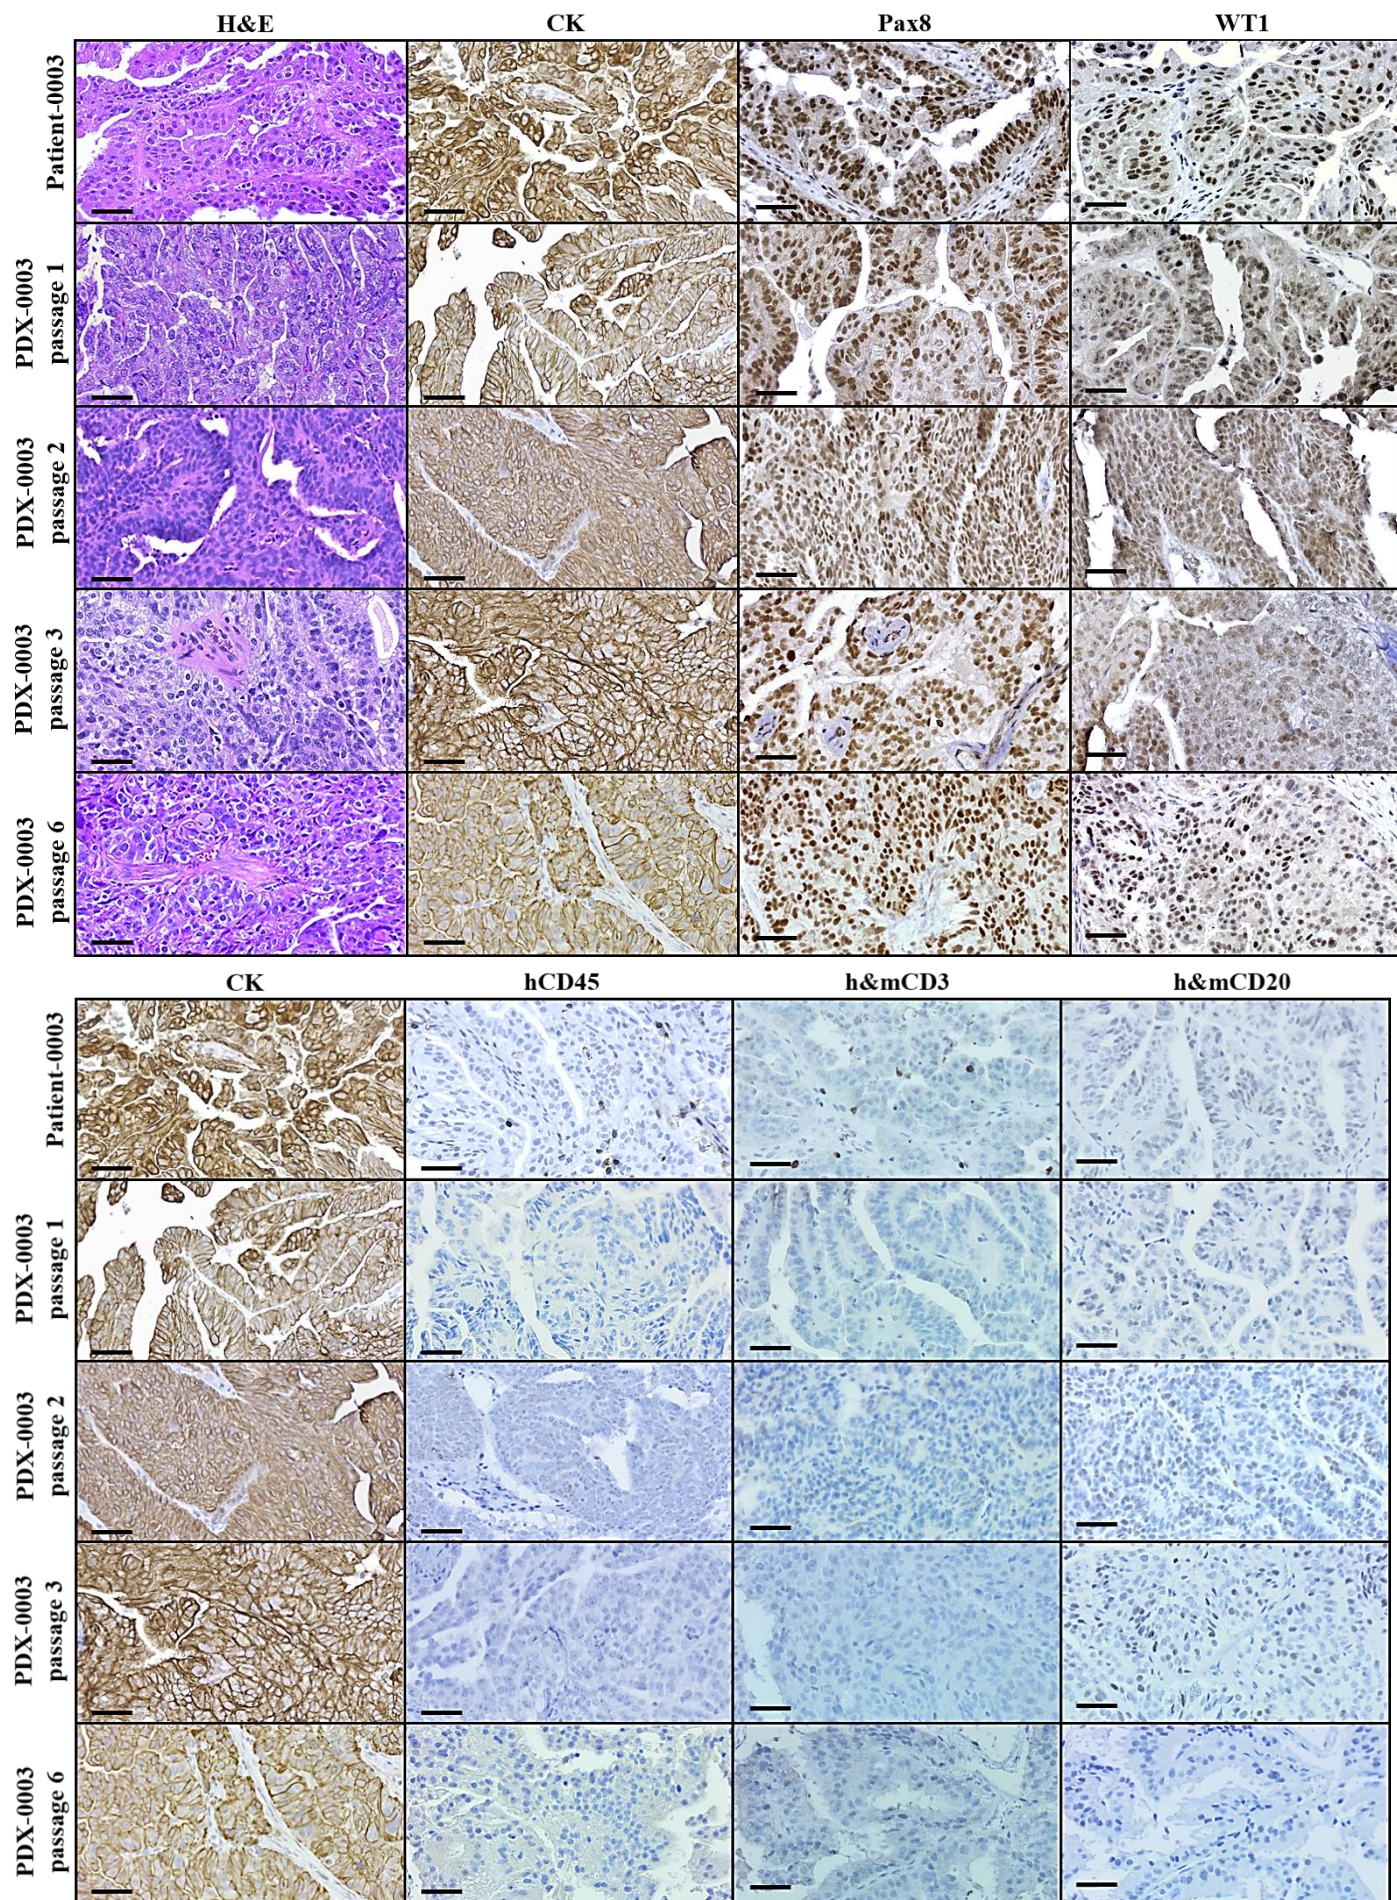



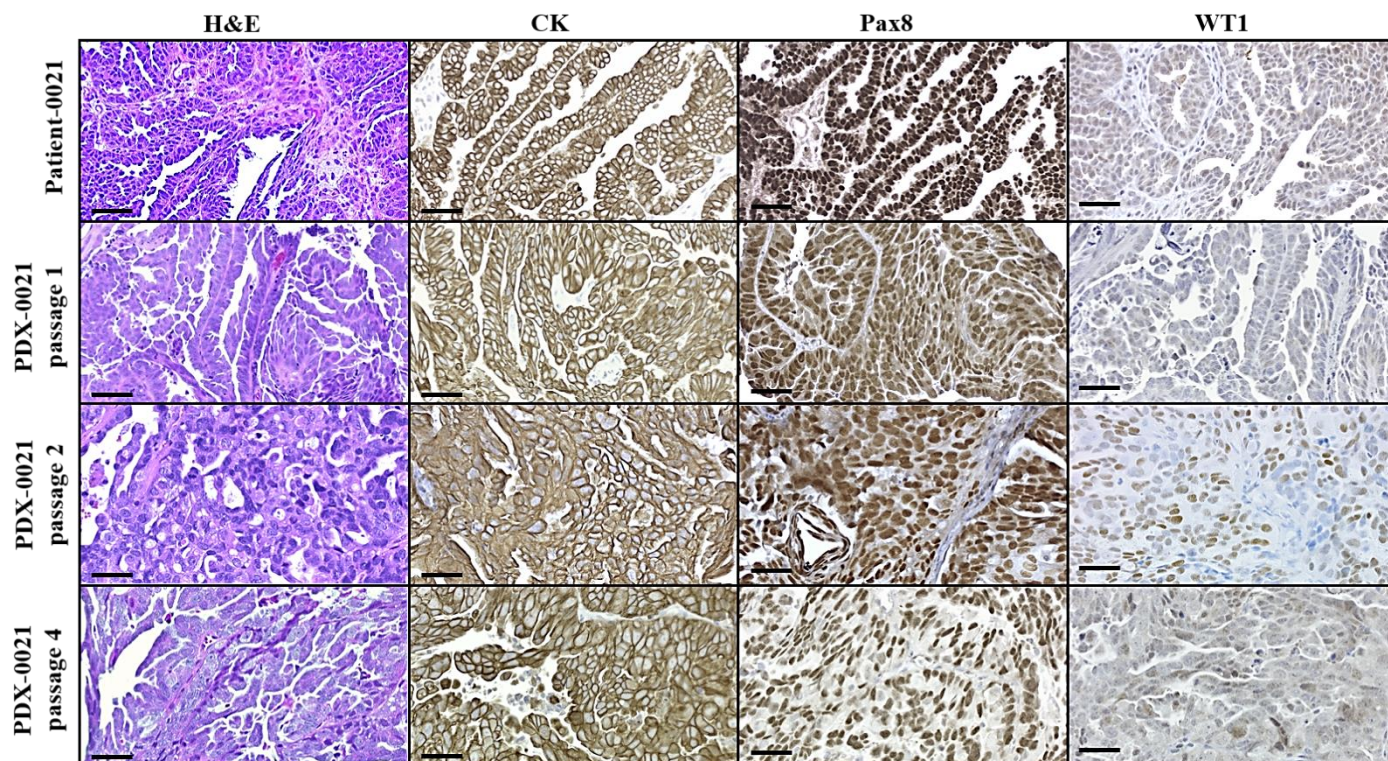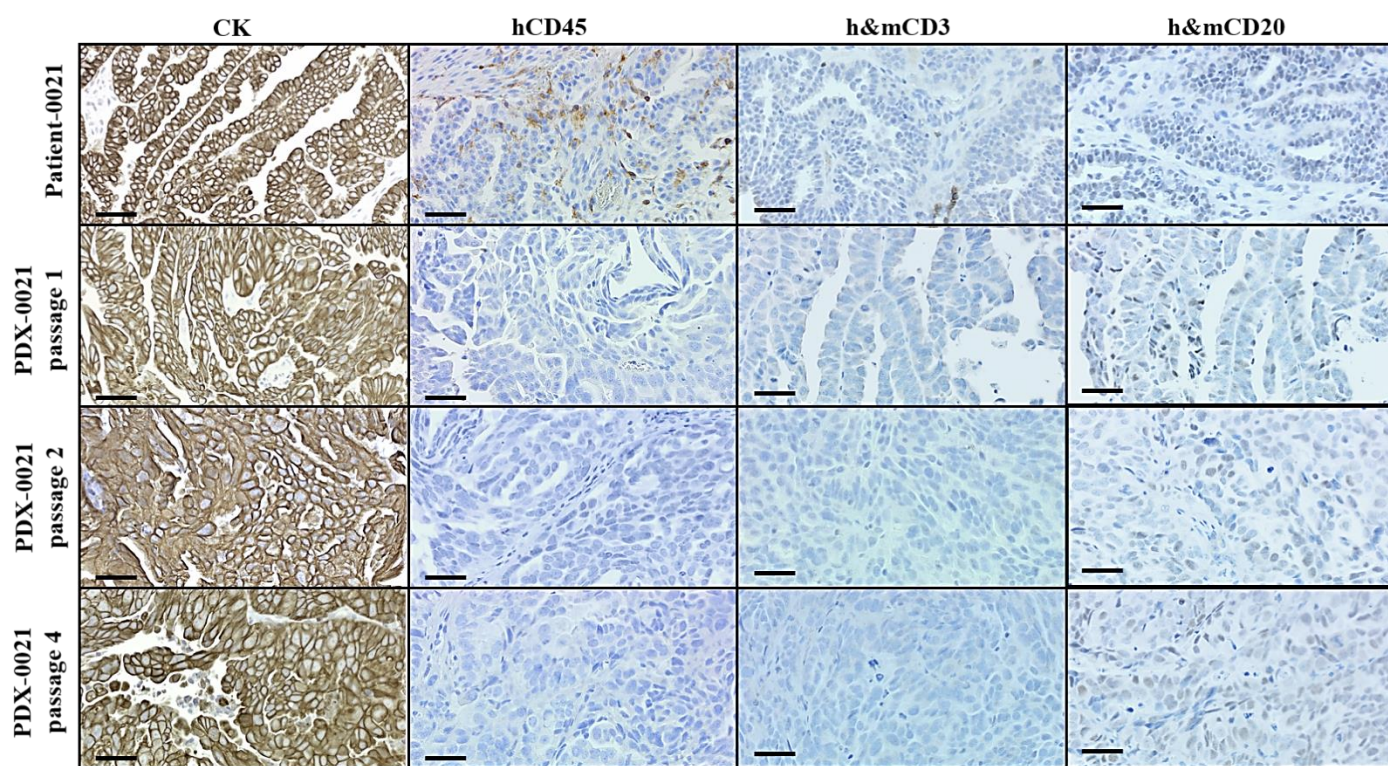



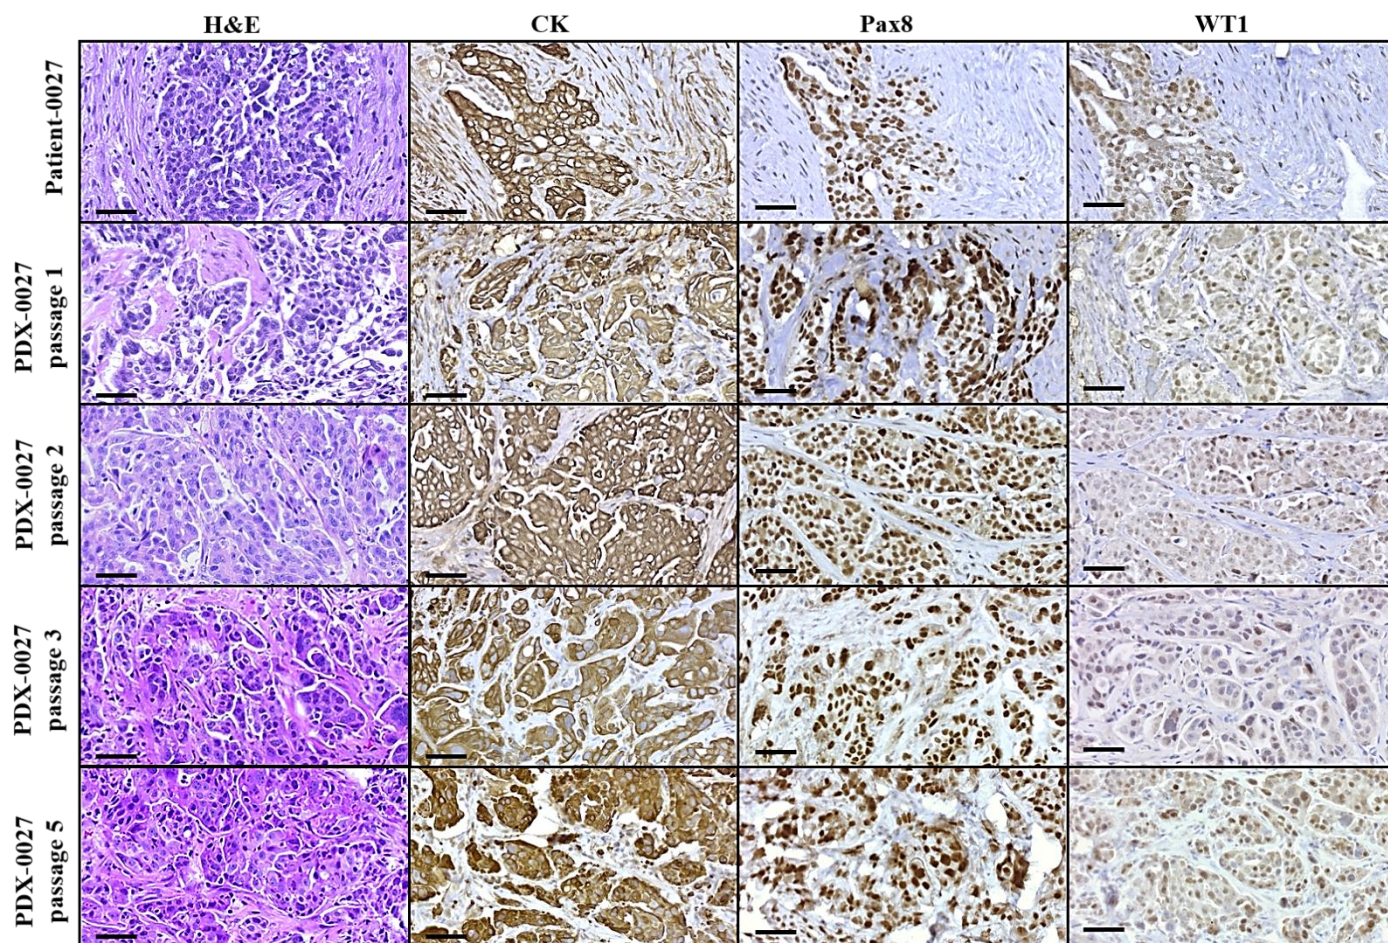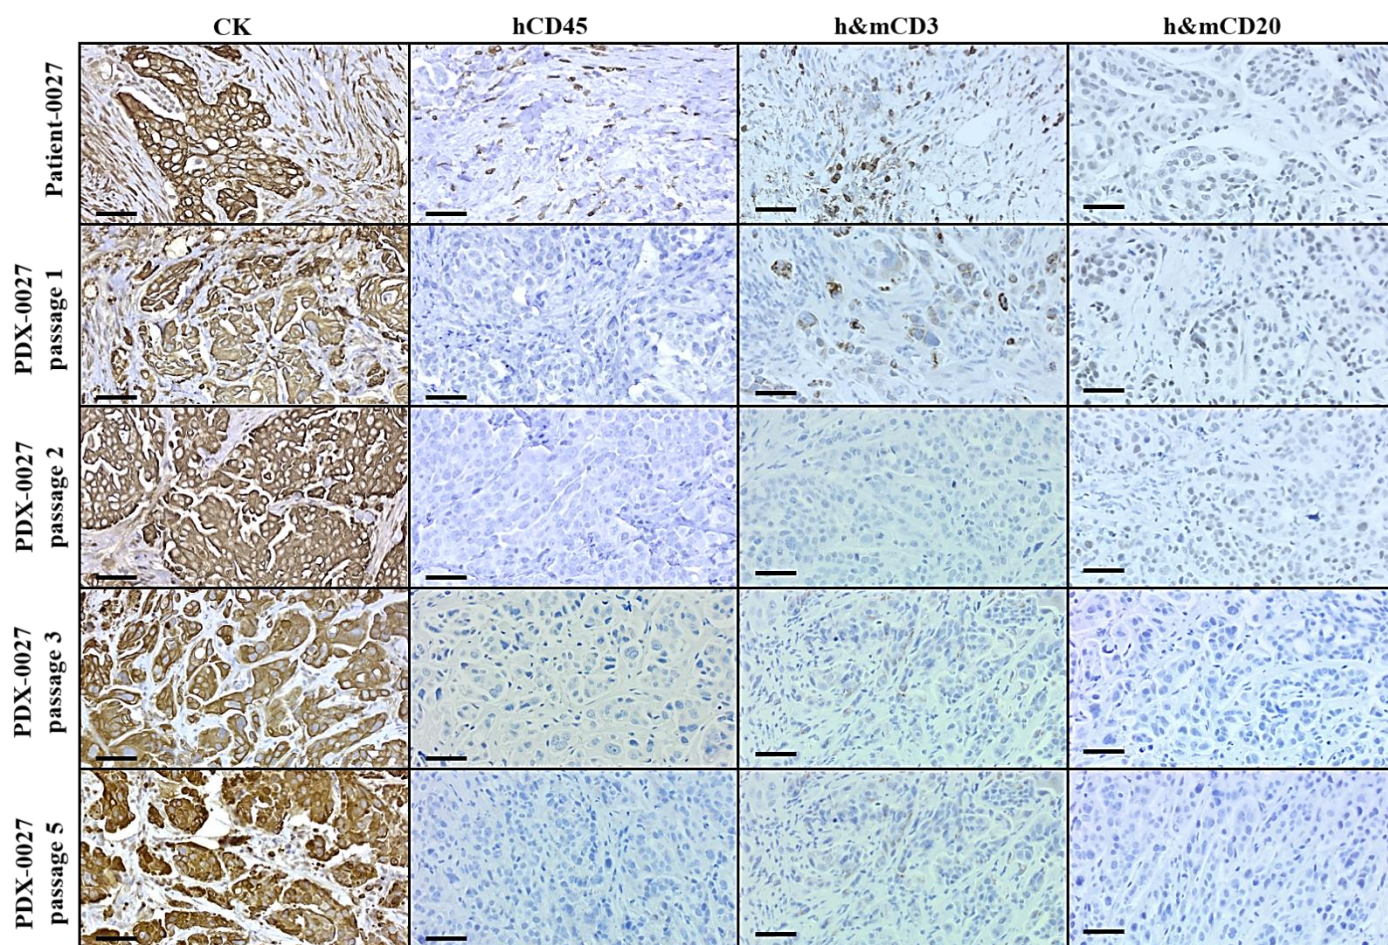



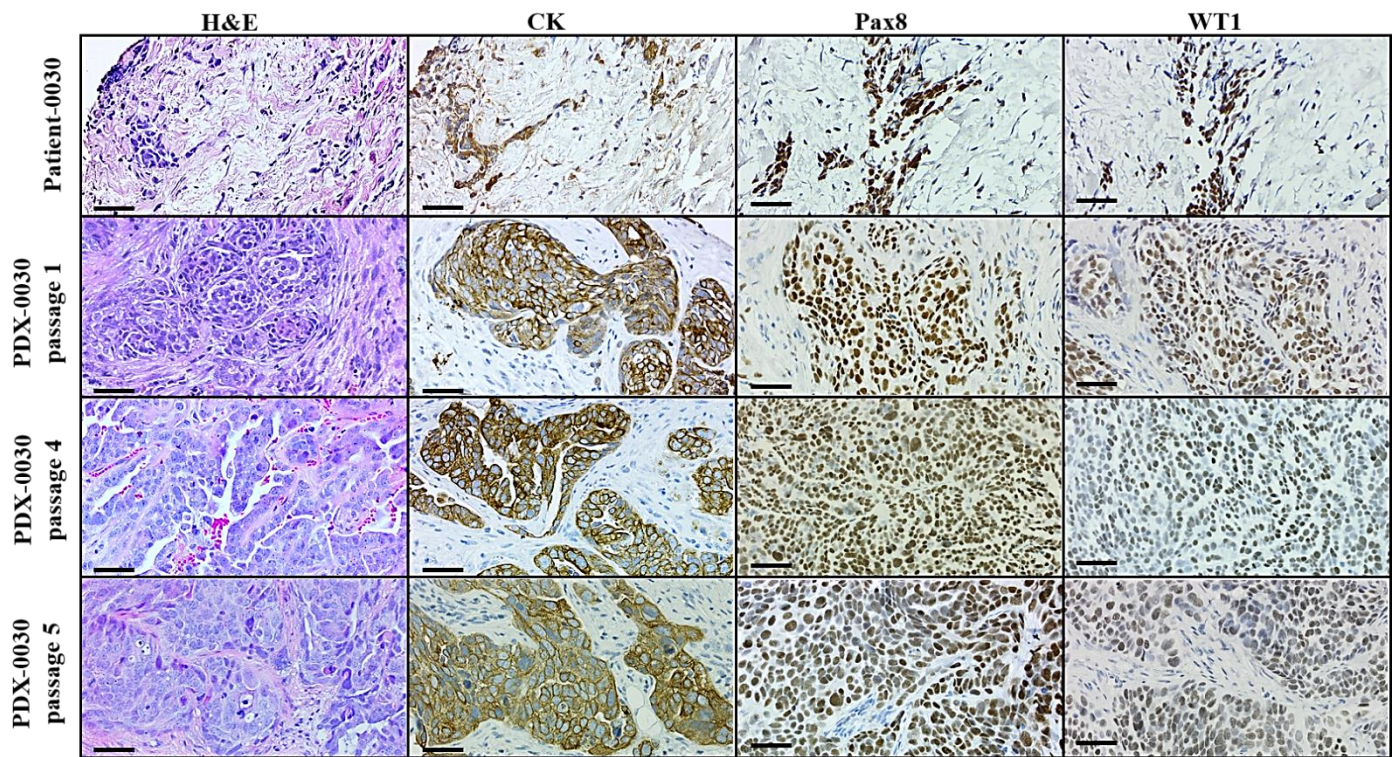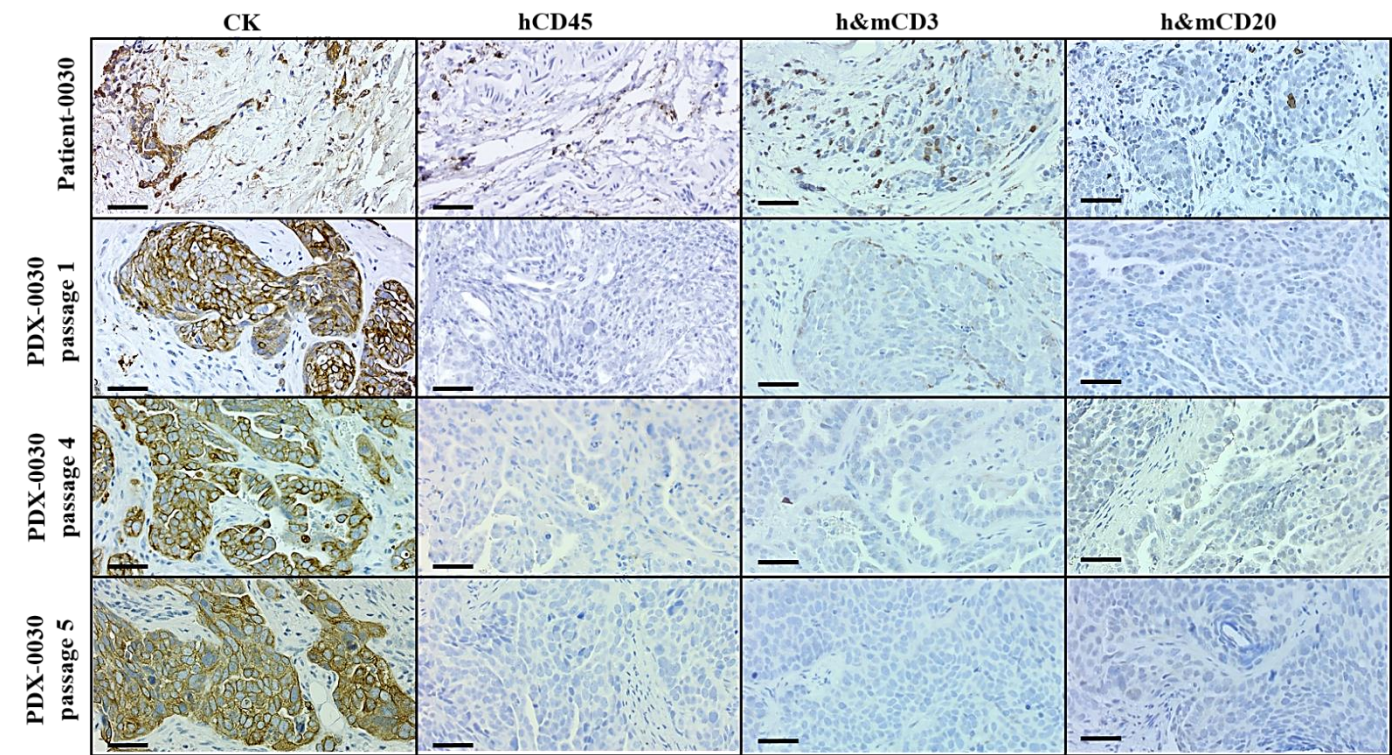



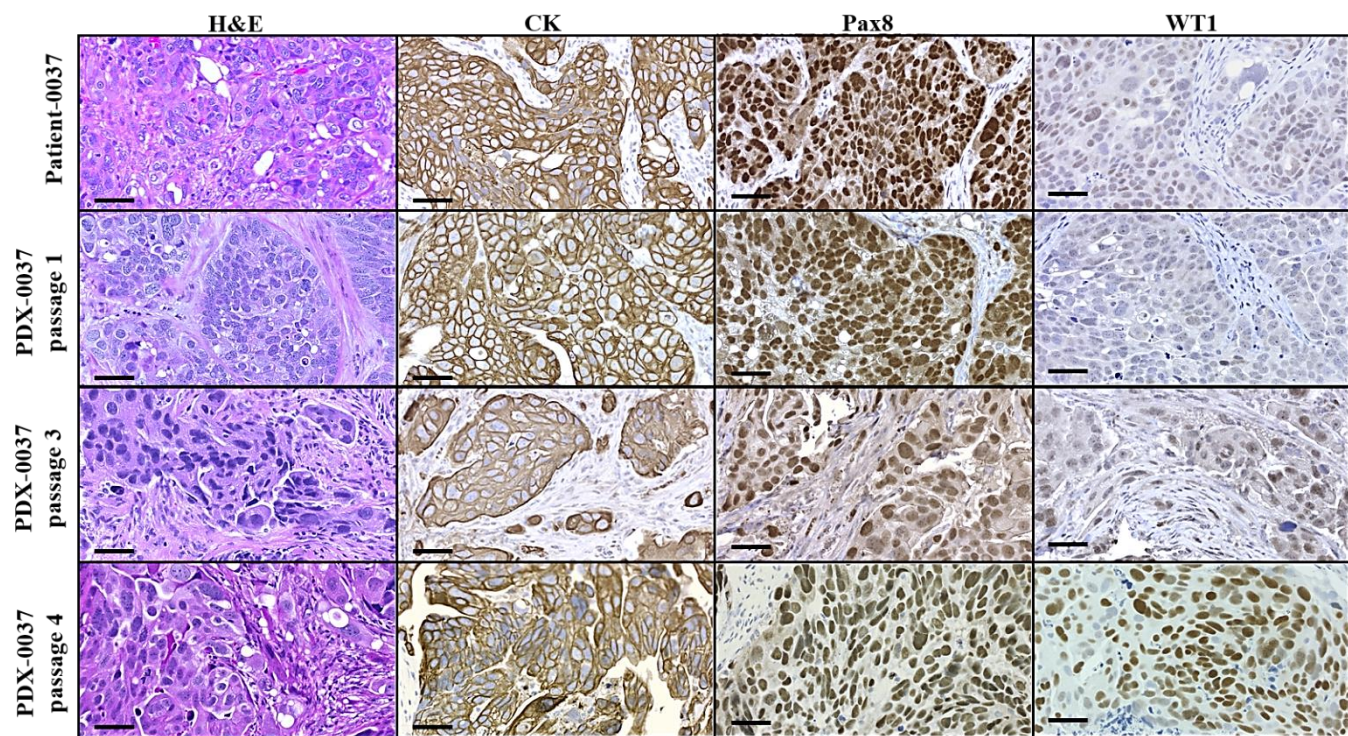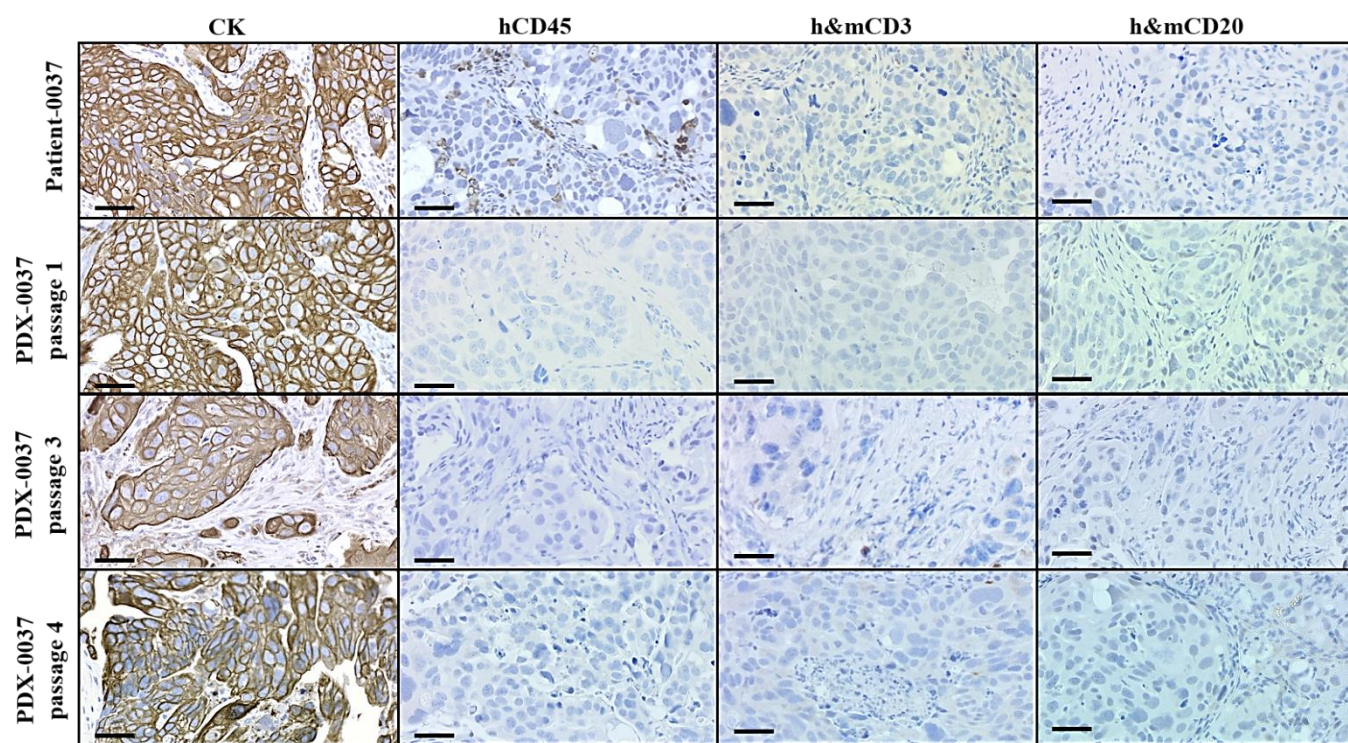



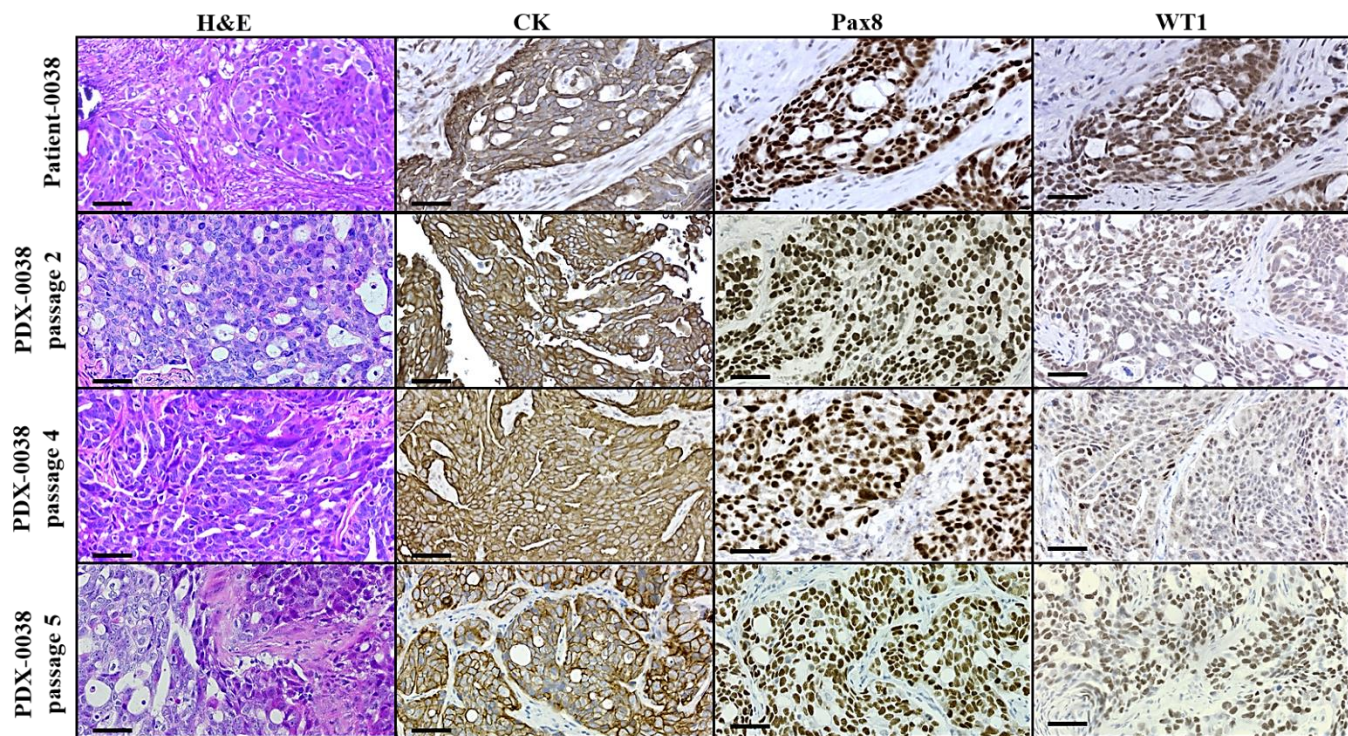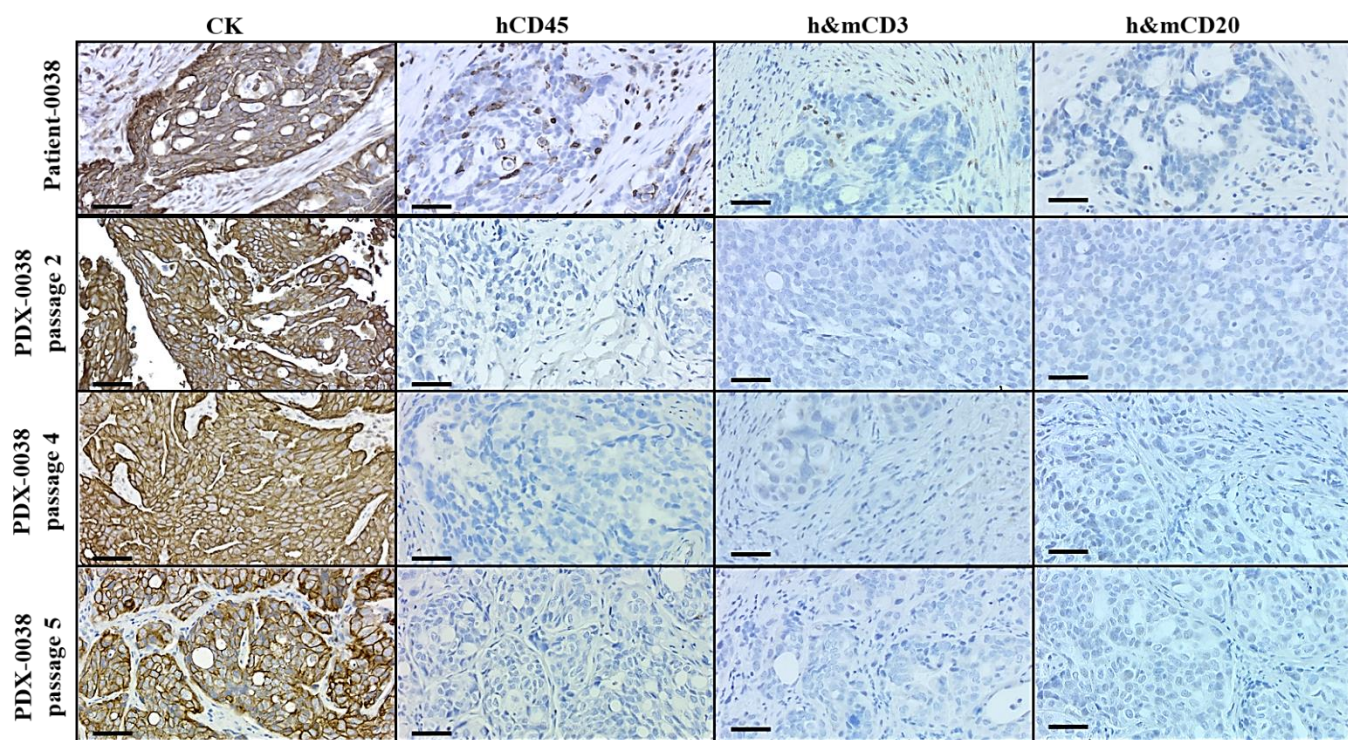



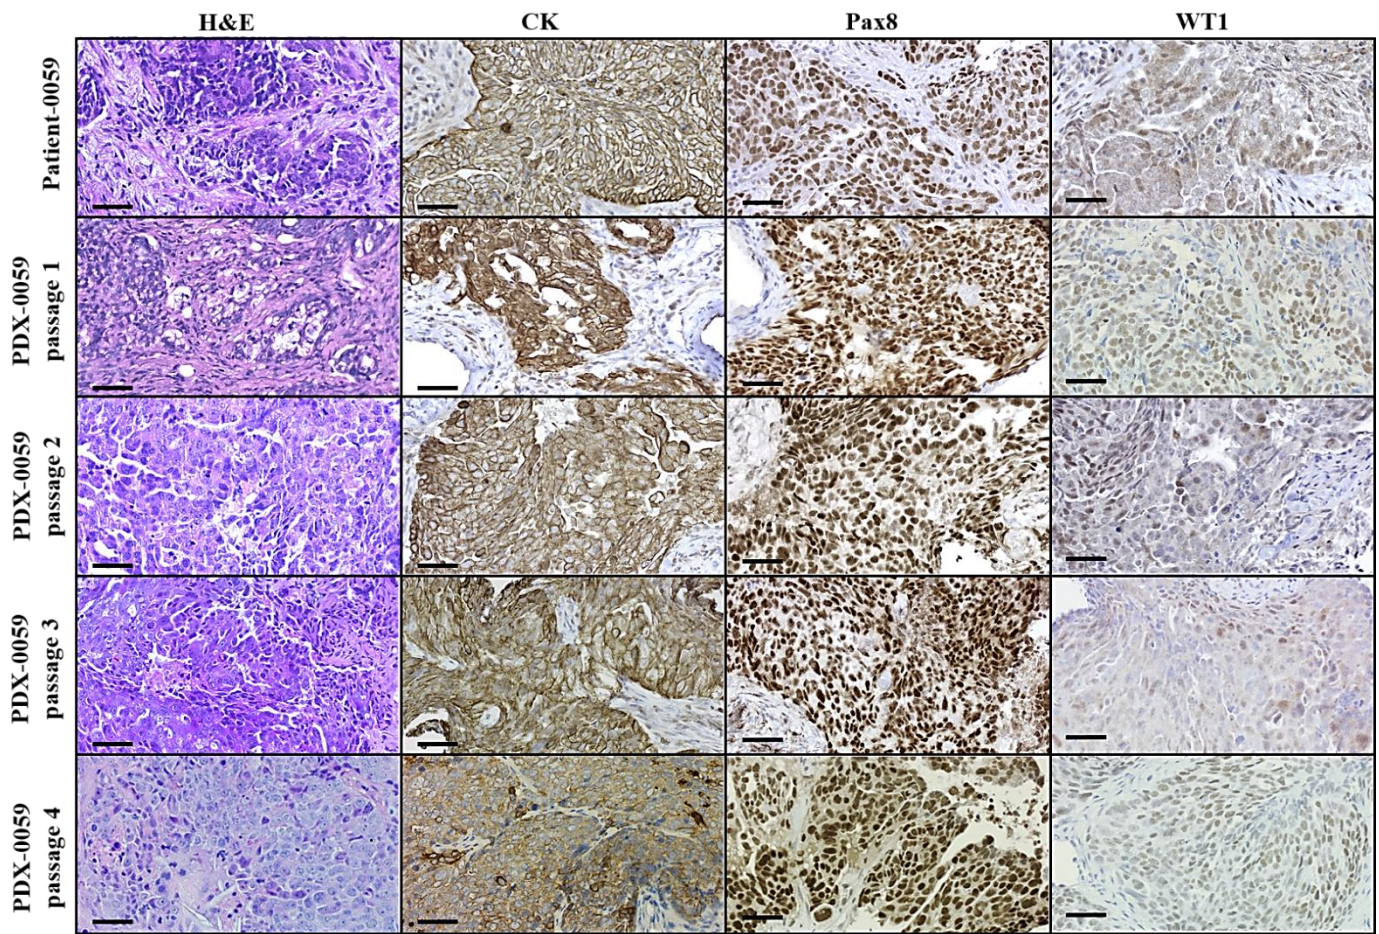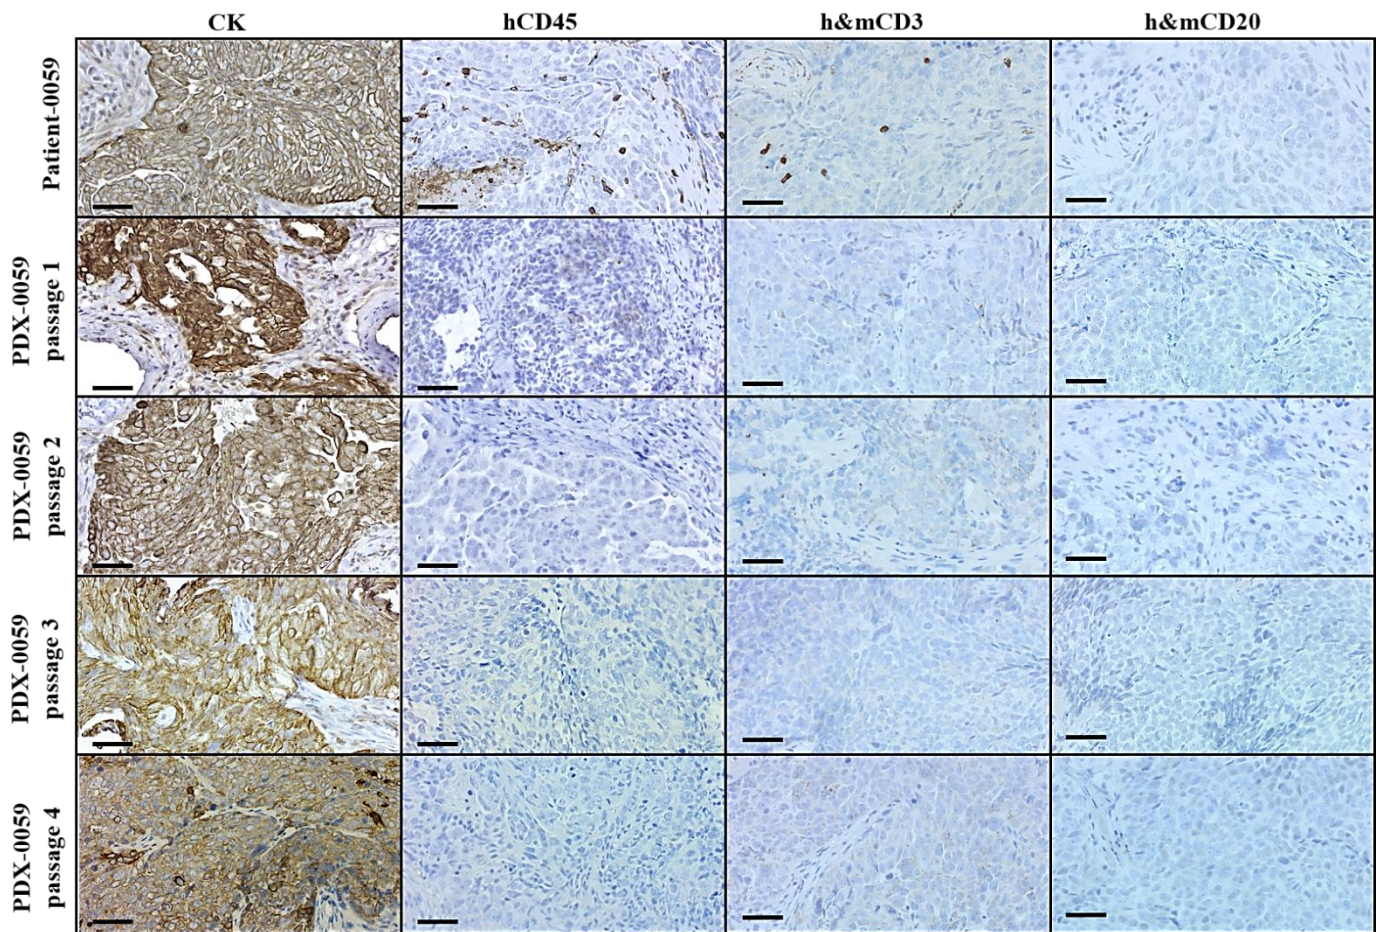



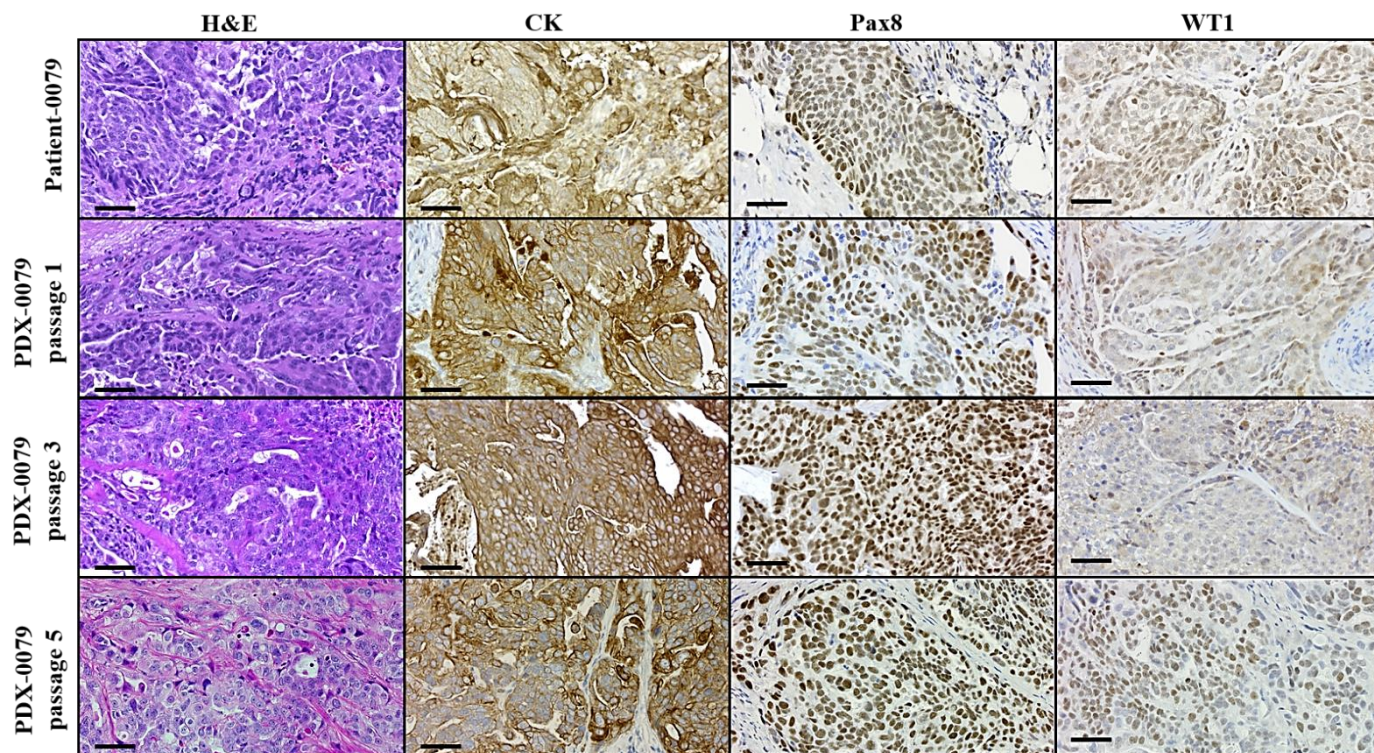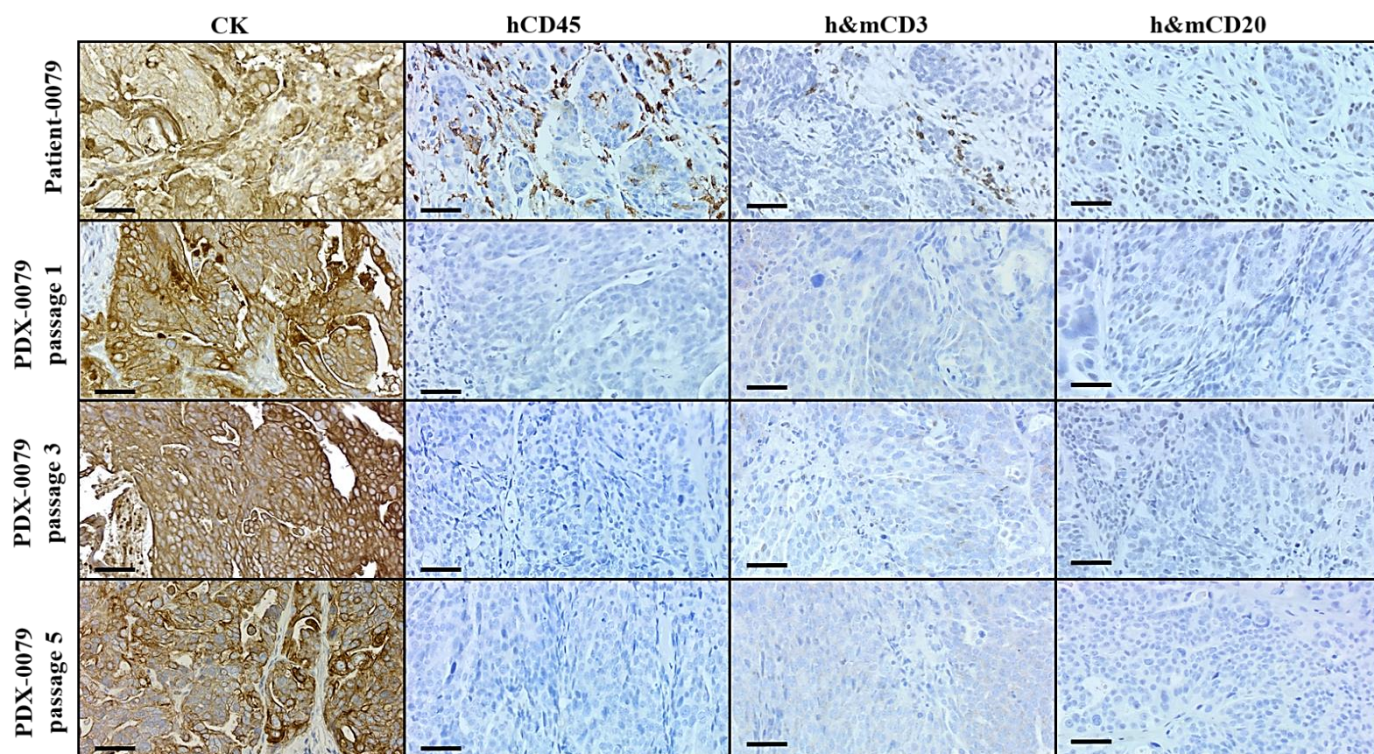



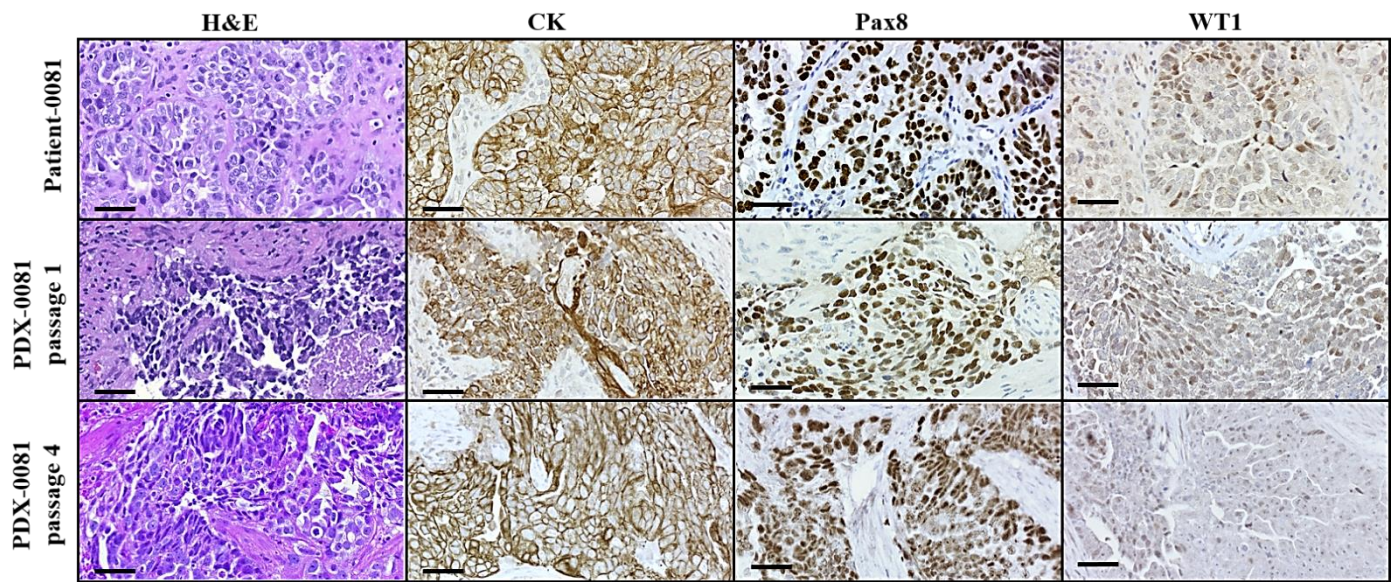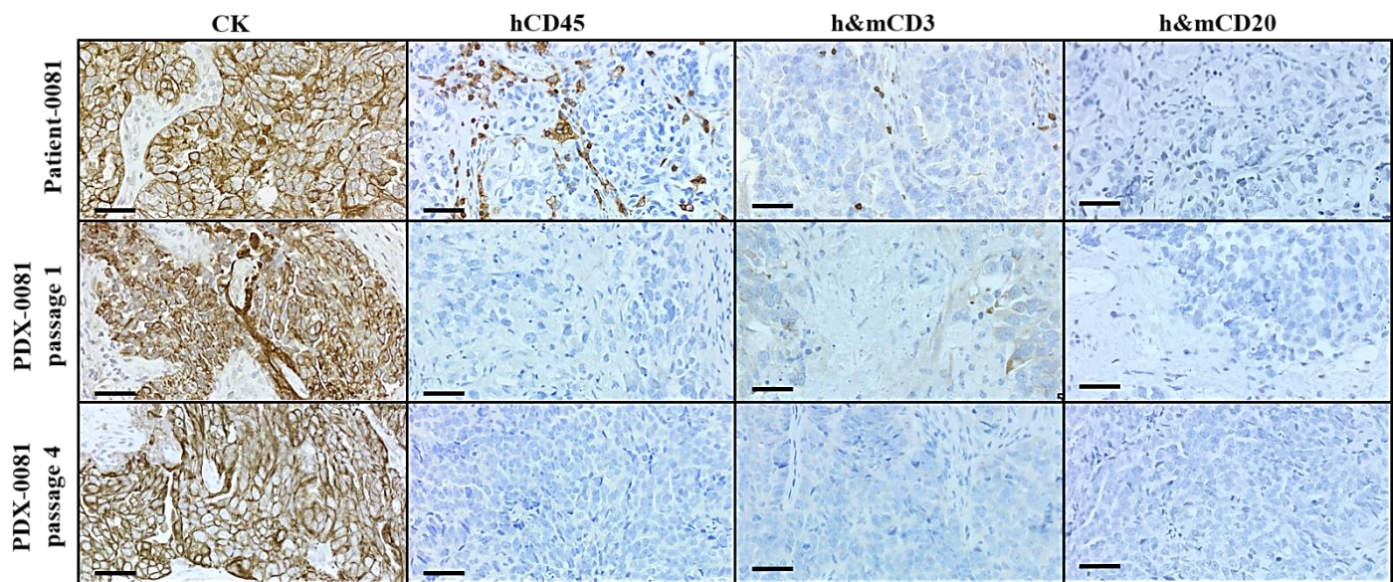



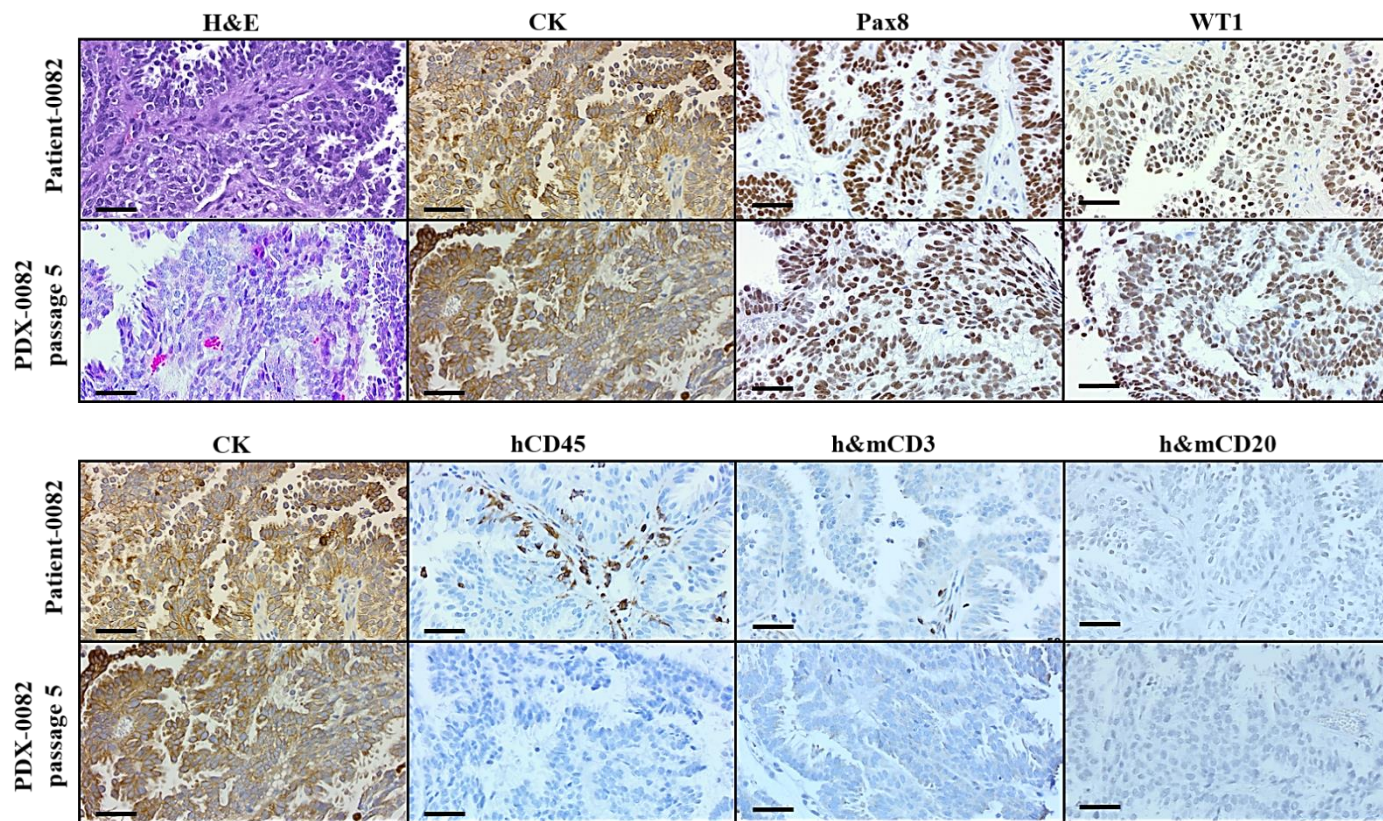



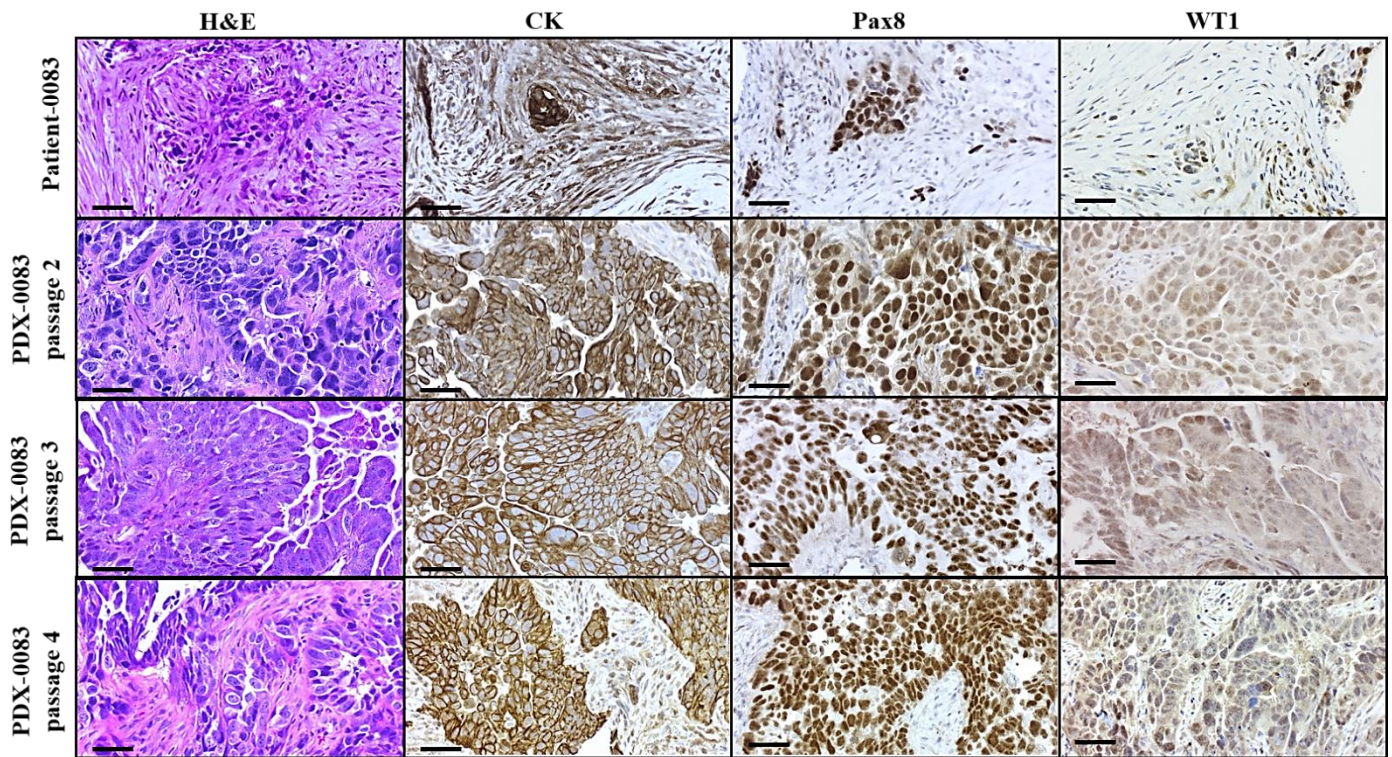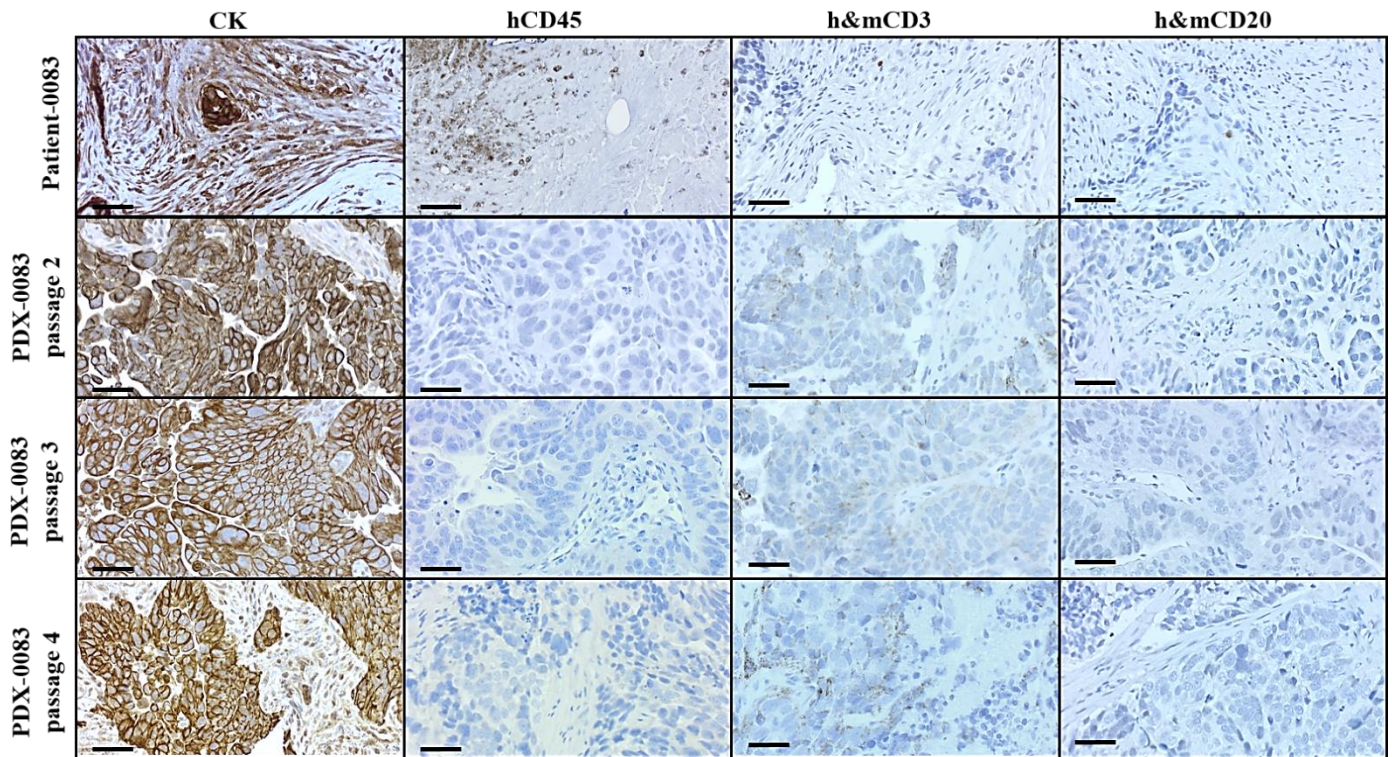



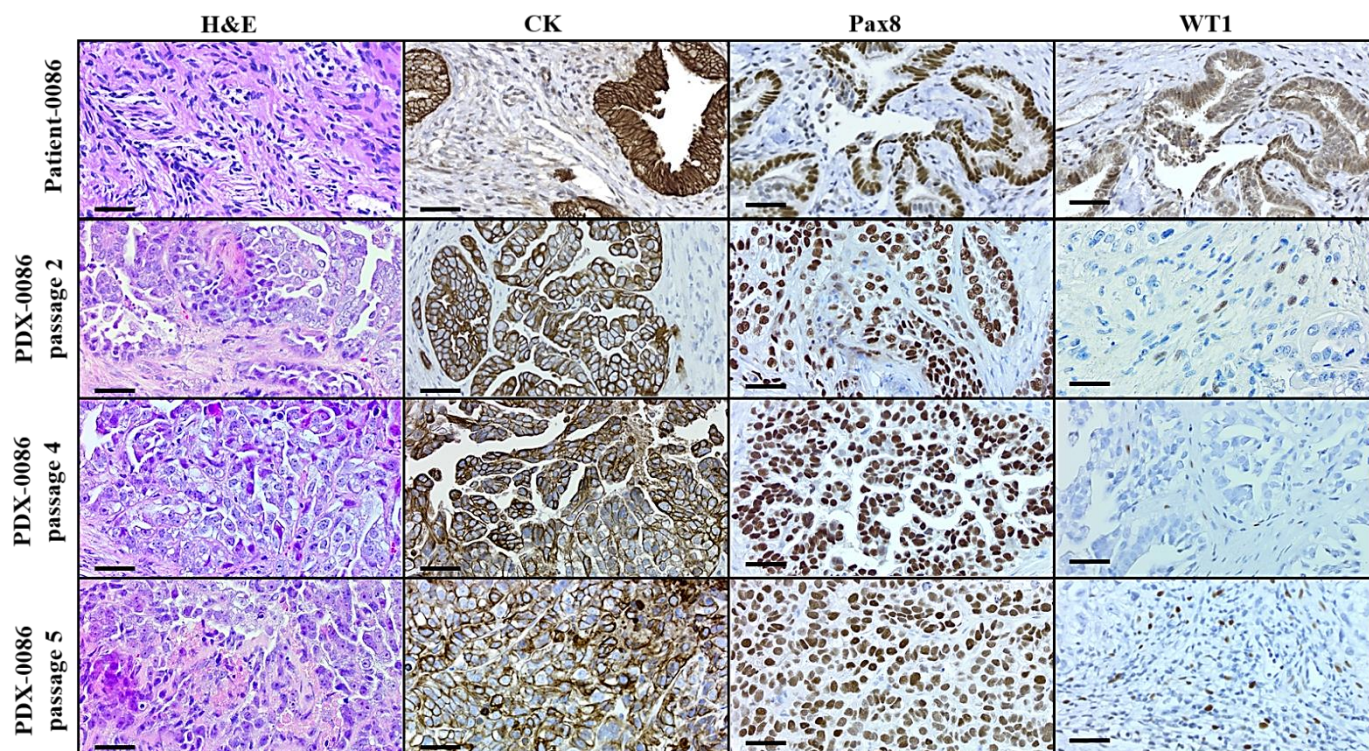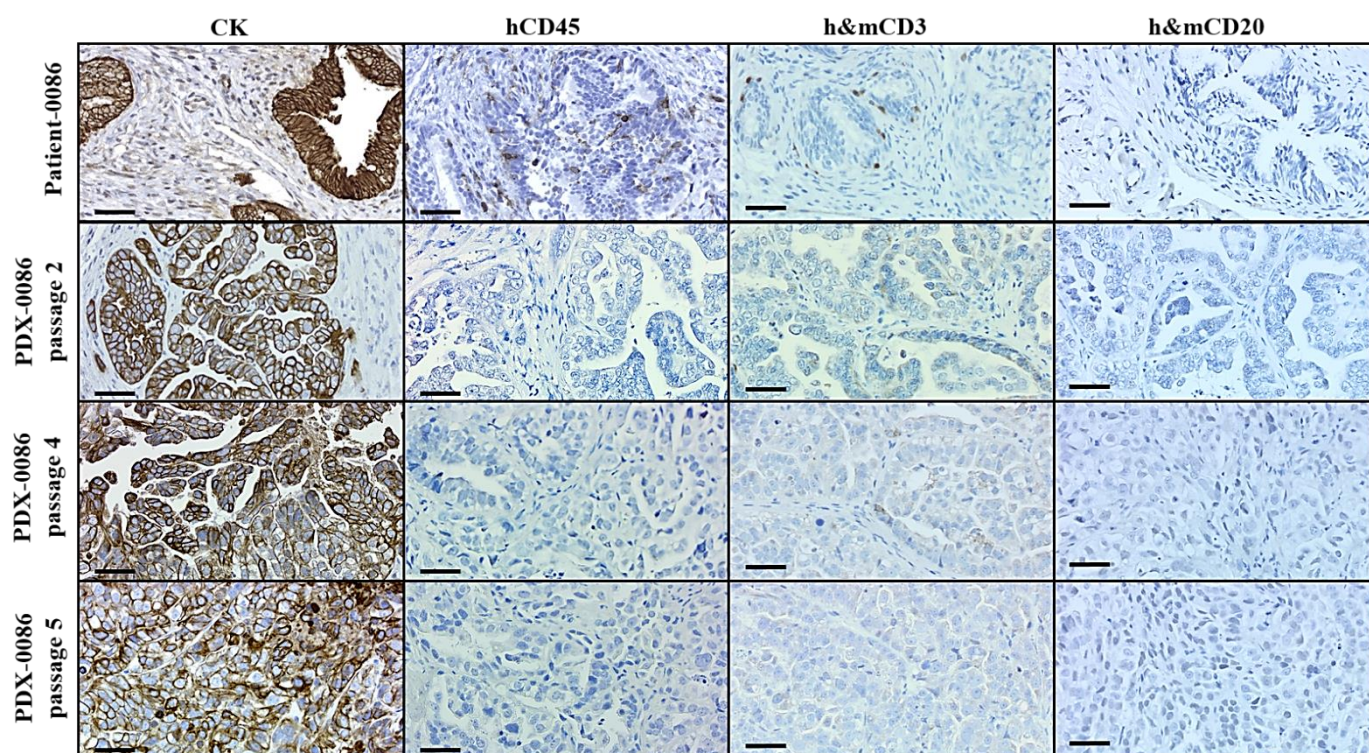



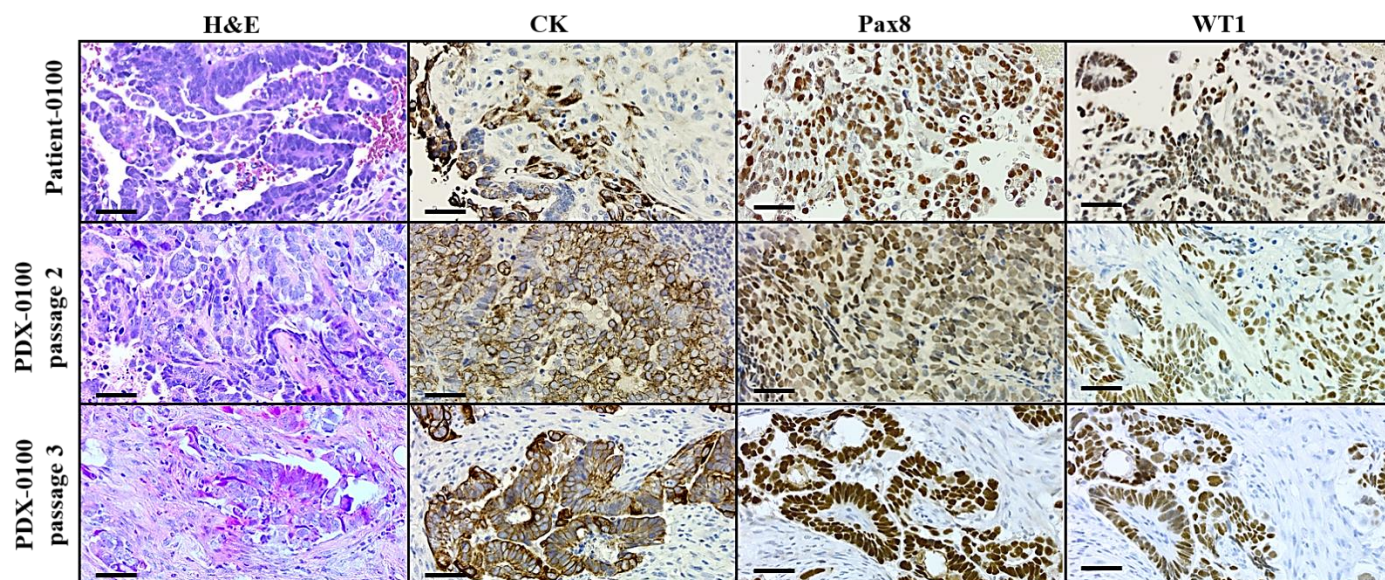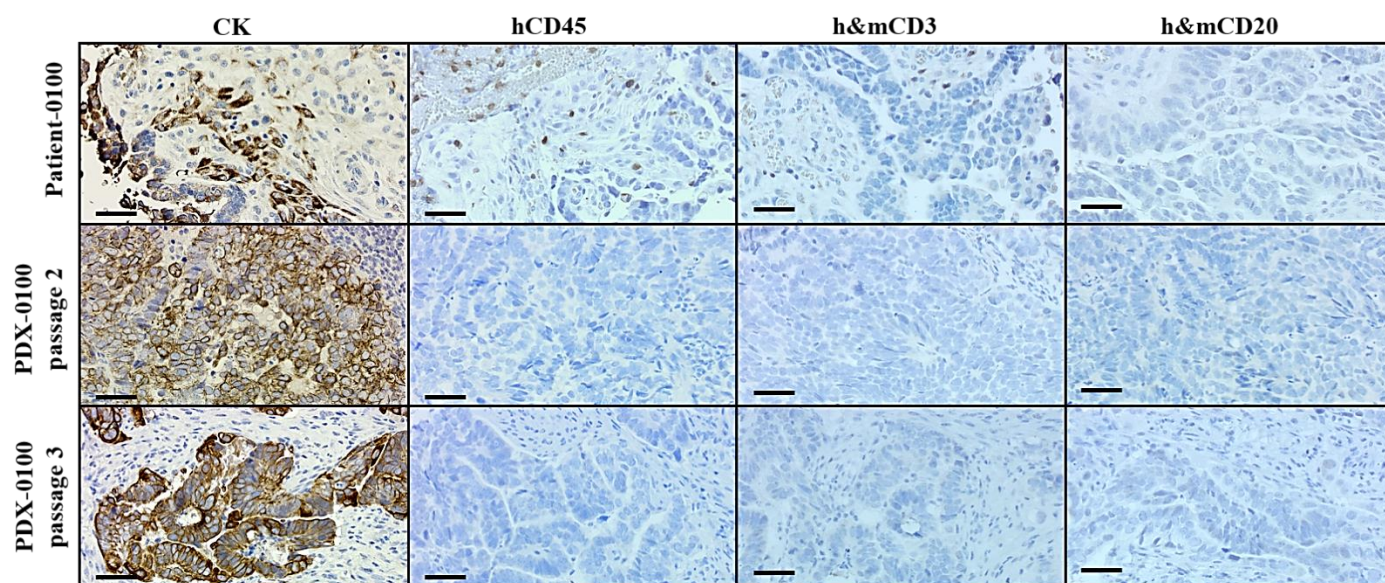



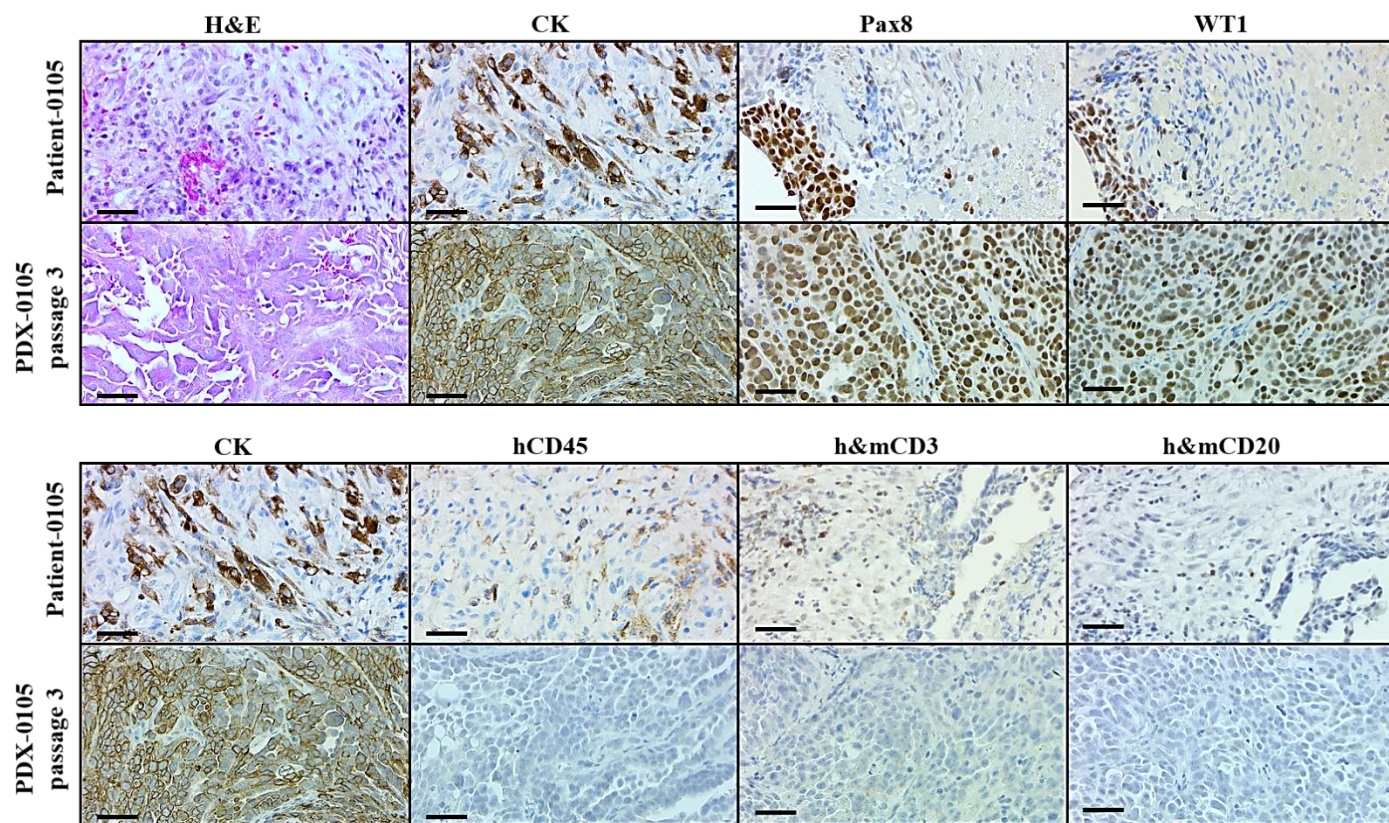



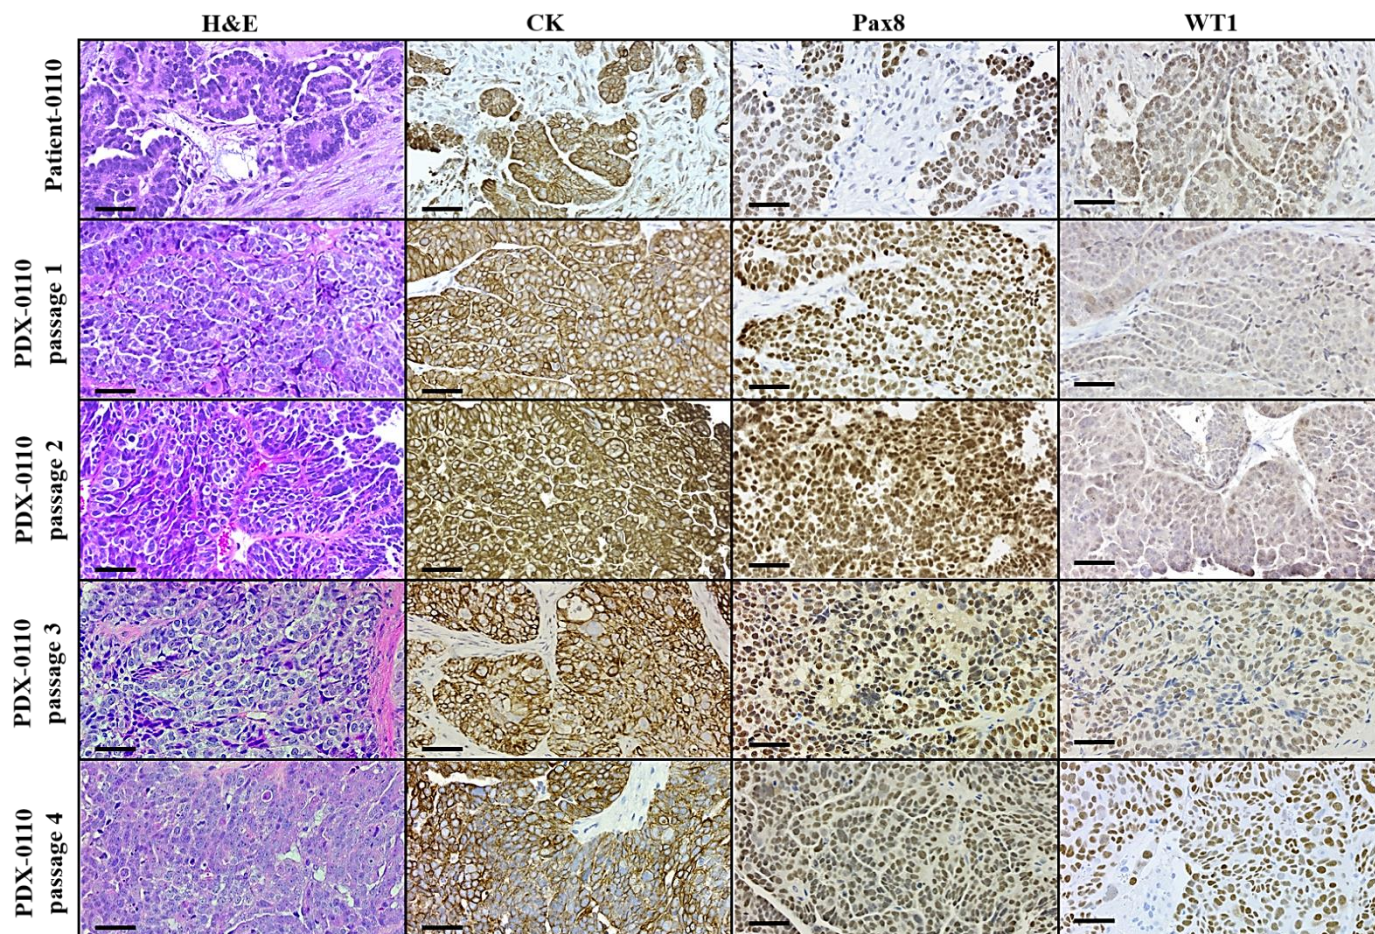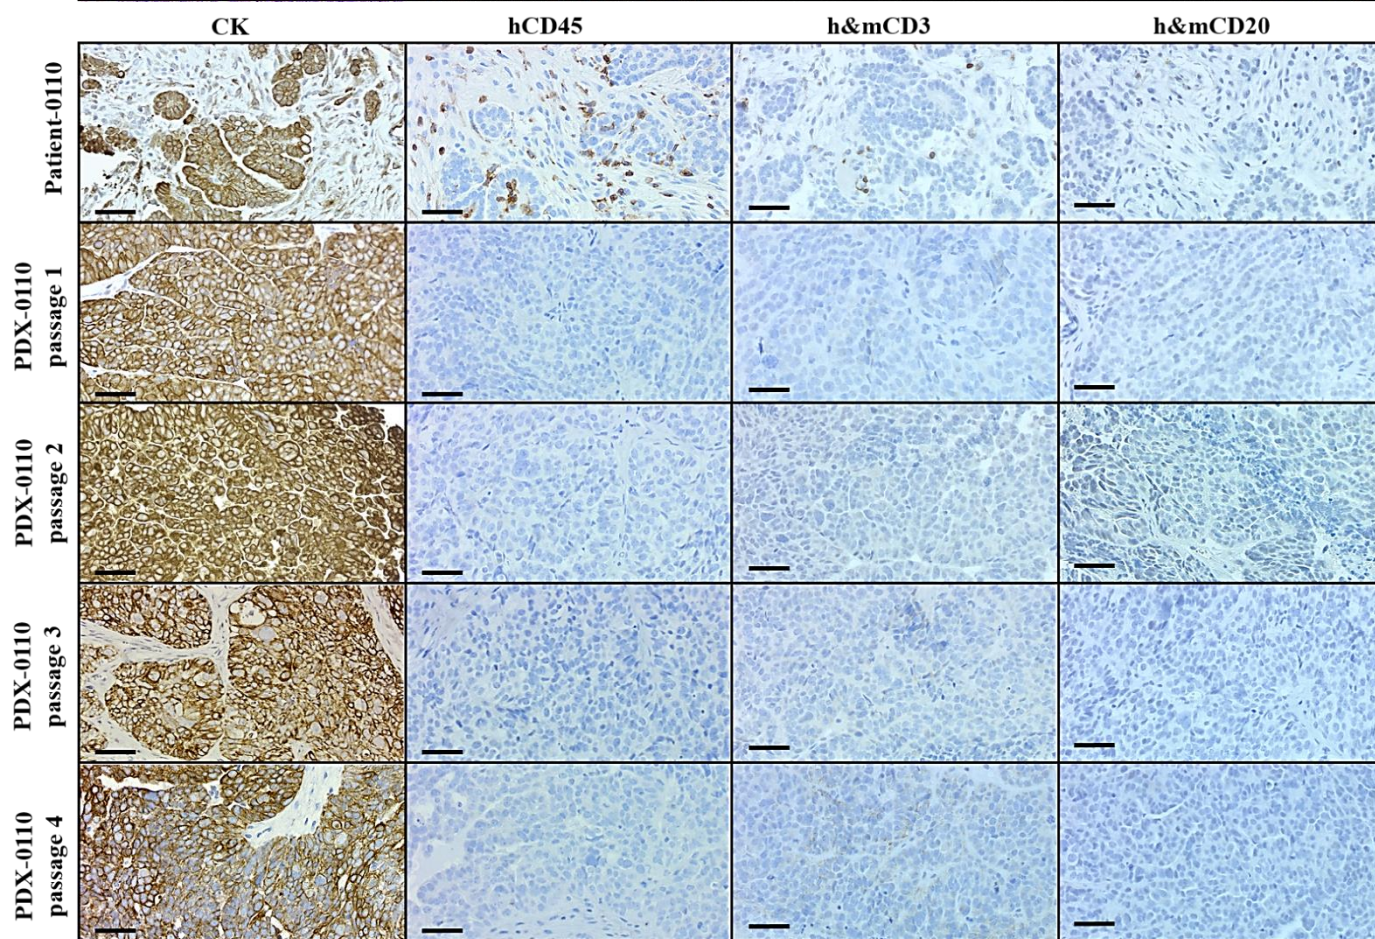



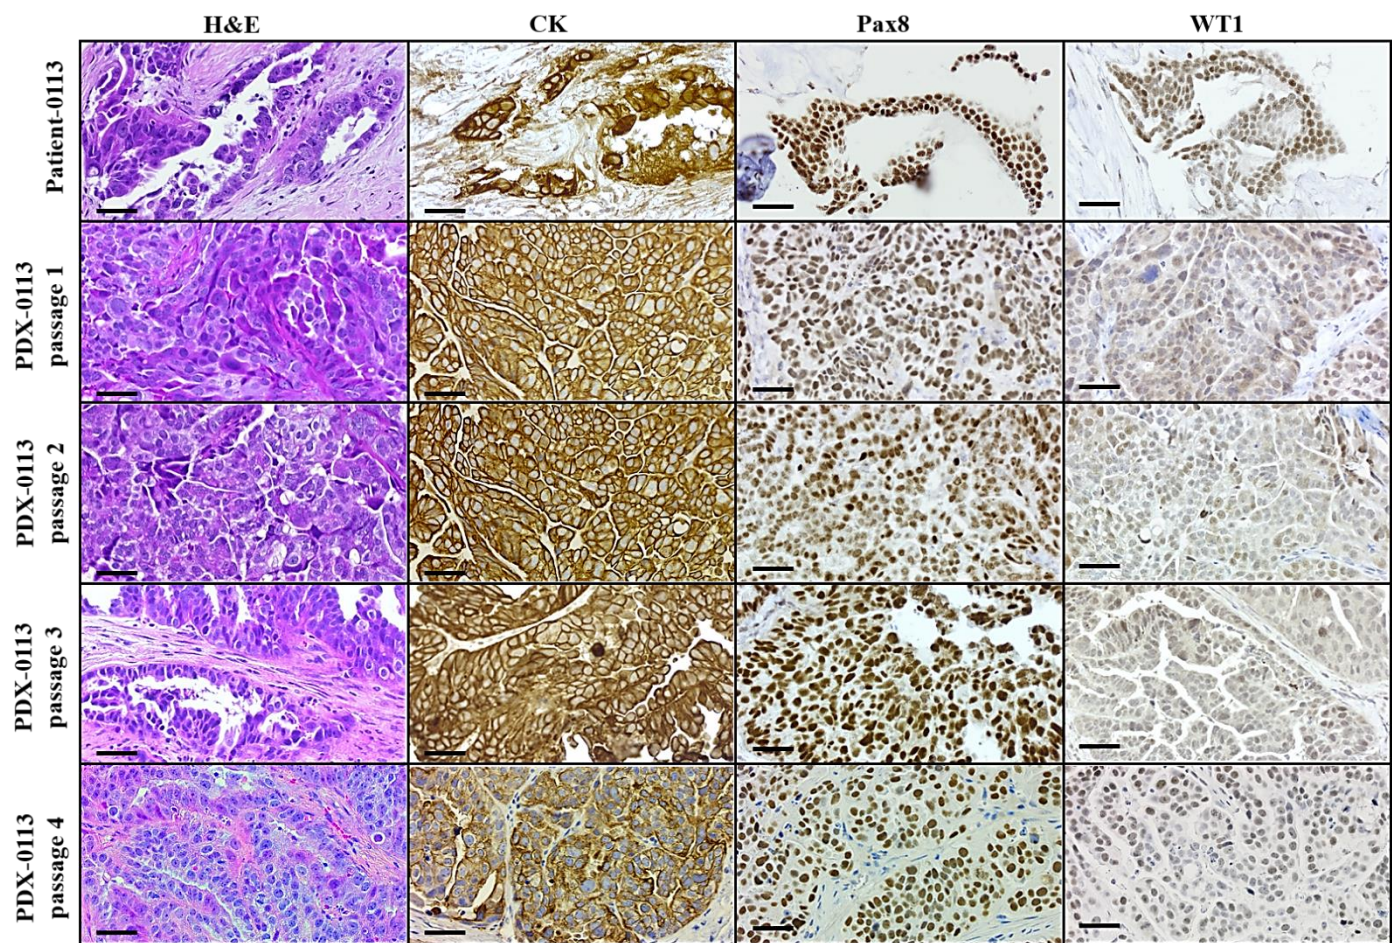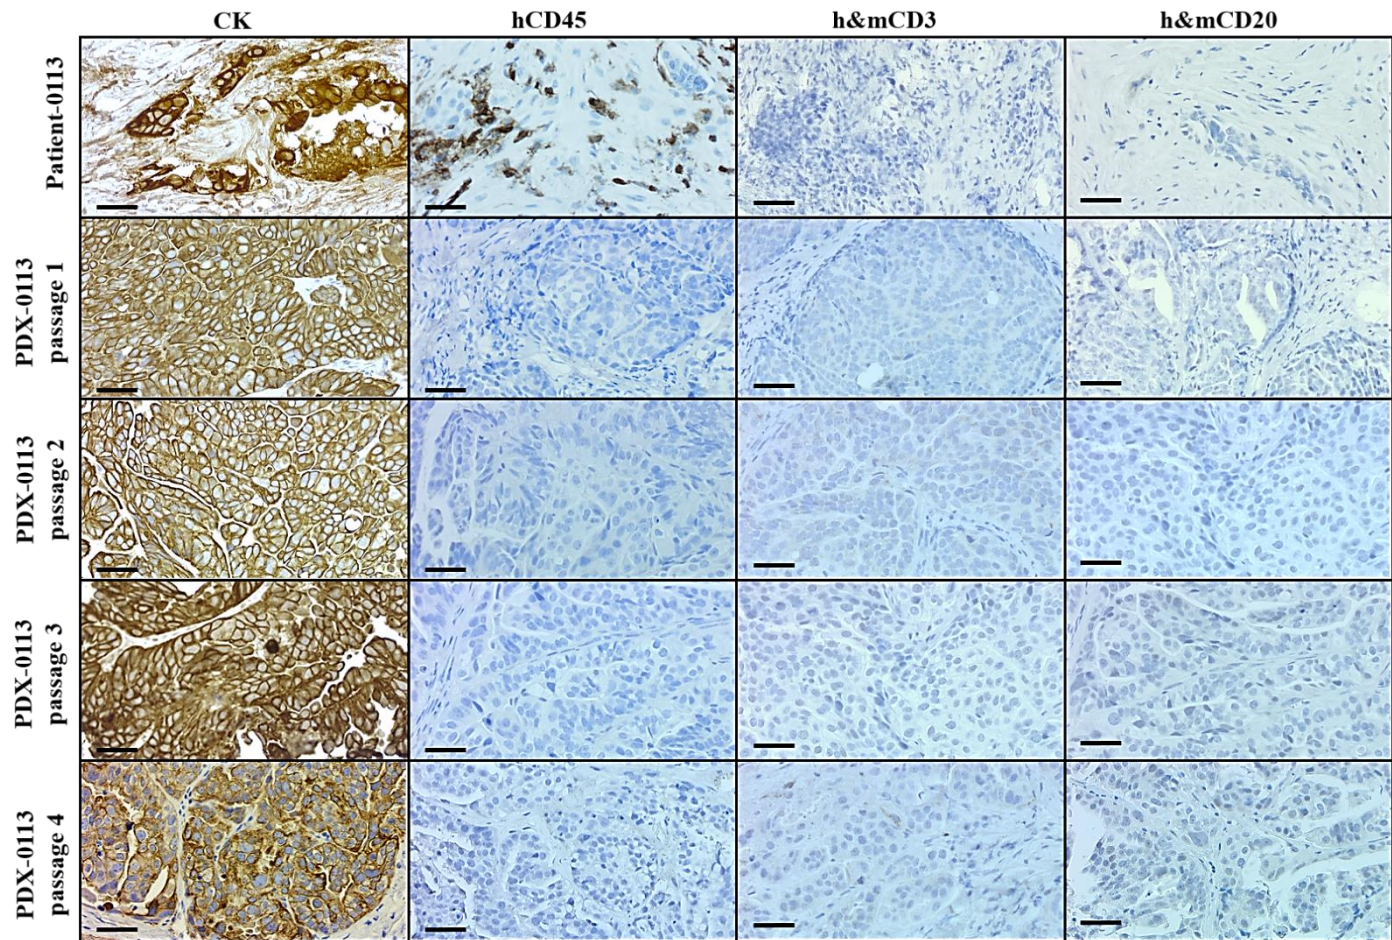



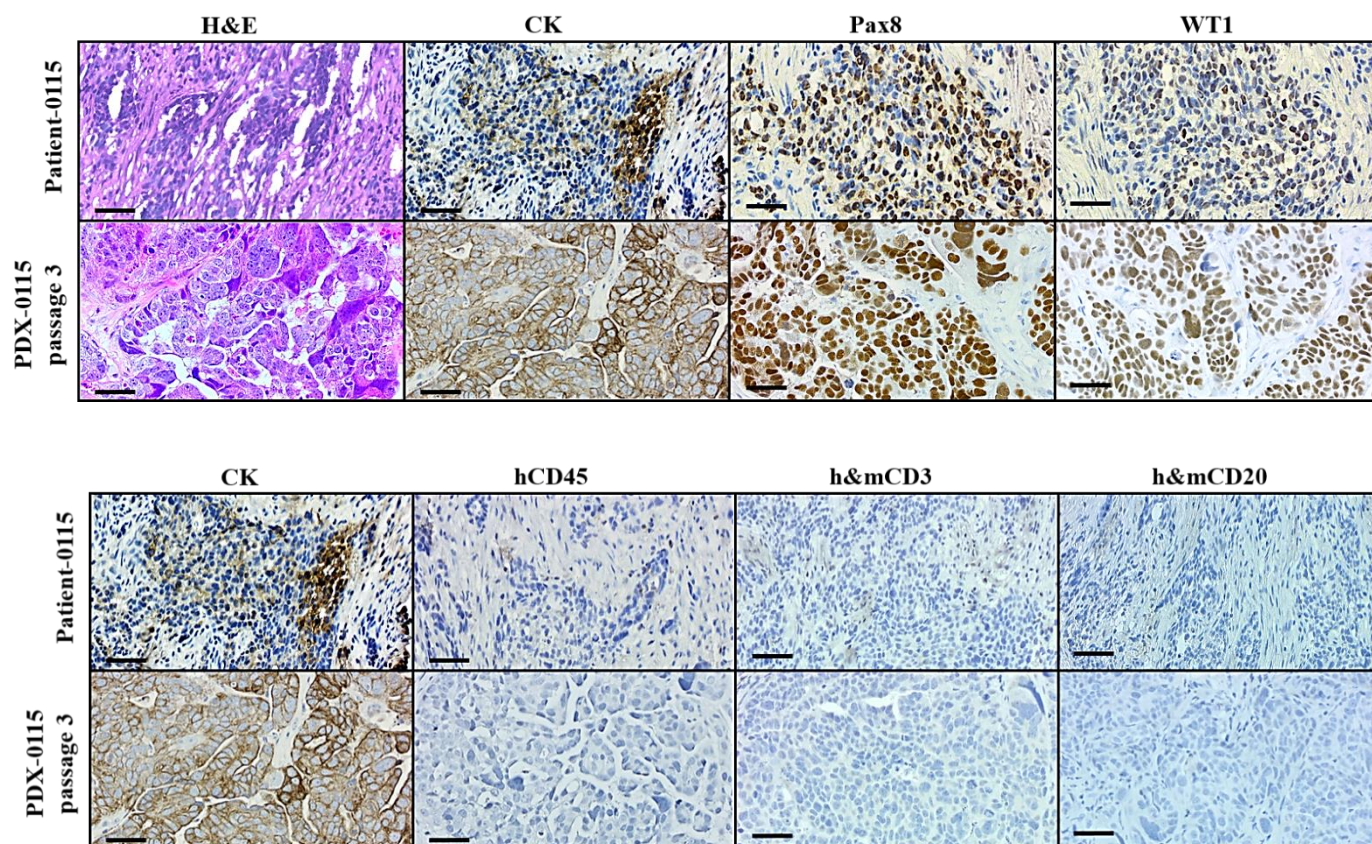

**Figure S3. IHC characterization of PDXs.** Tumor sections of PDX models across multiple passages were H&E stained and evaluated by IHC for HGSOC subtype markers (CK, PAX8, and WT1) and the presence of human and/or mouse immune cells (hCD45, h&mCD3, and h&mCD20); h – human specific antibody, h&m – human and mouse specific antibody. Scale bars represents 50  $\mu$ m.



## A

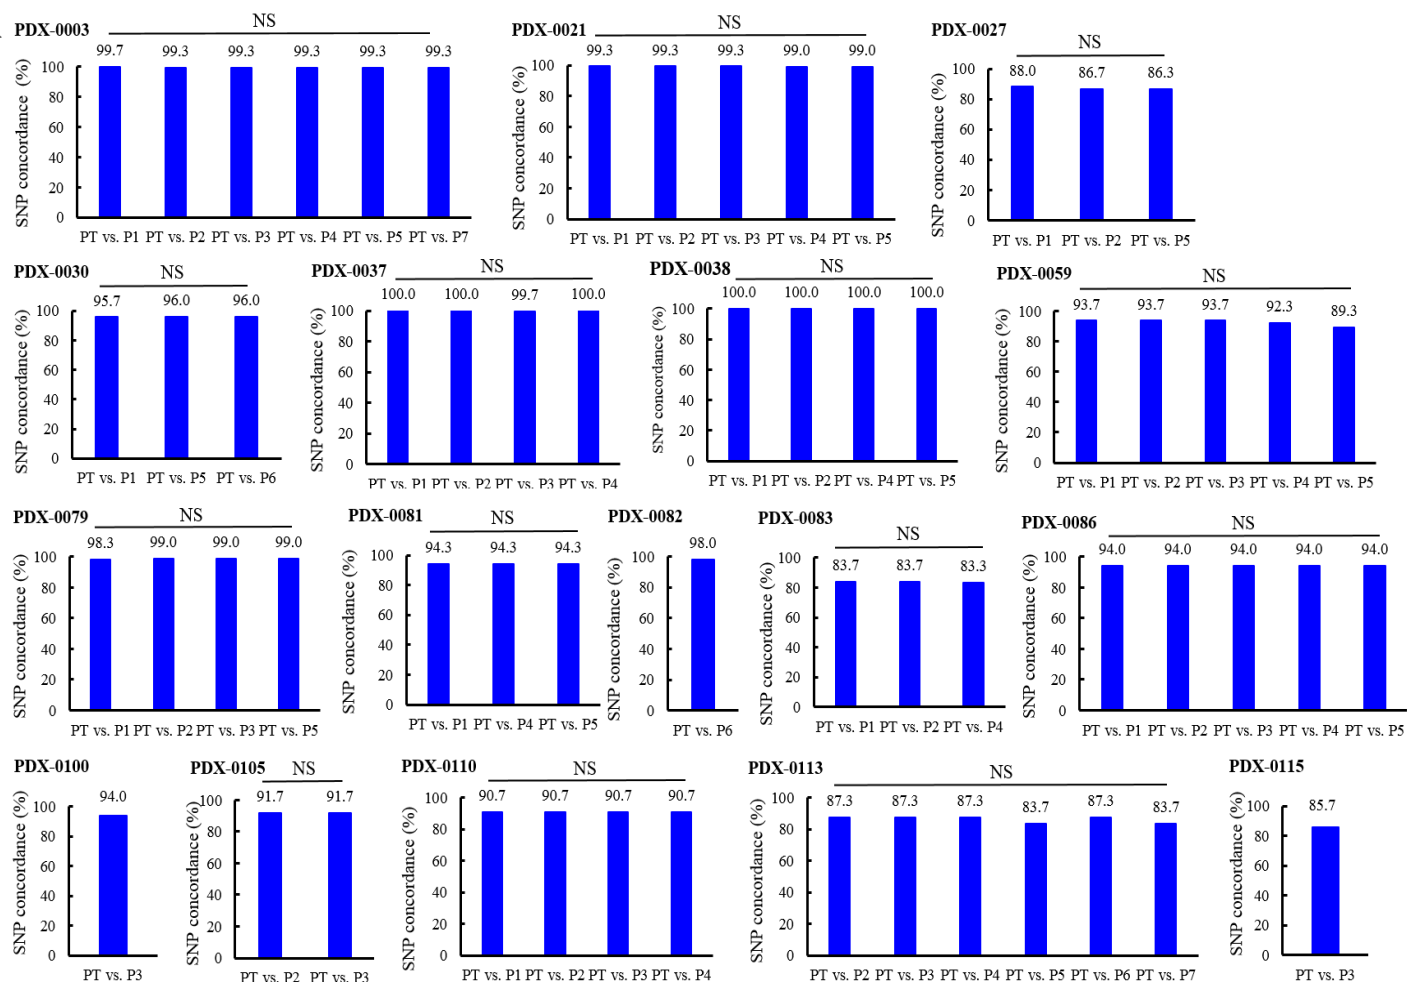



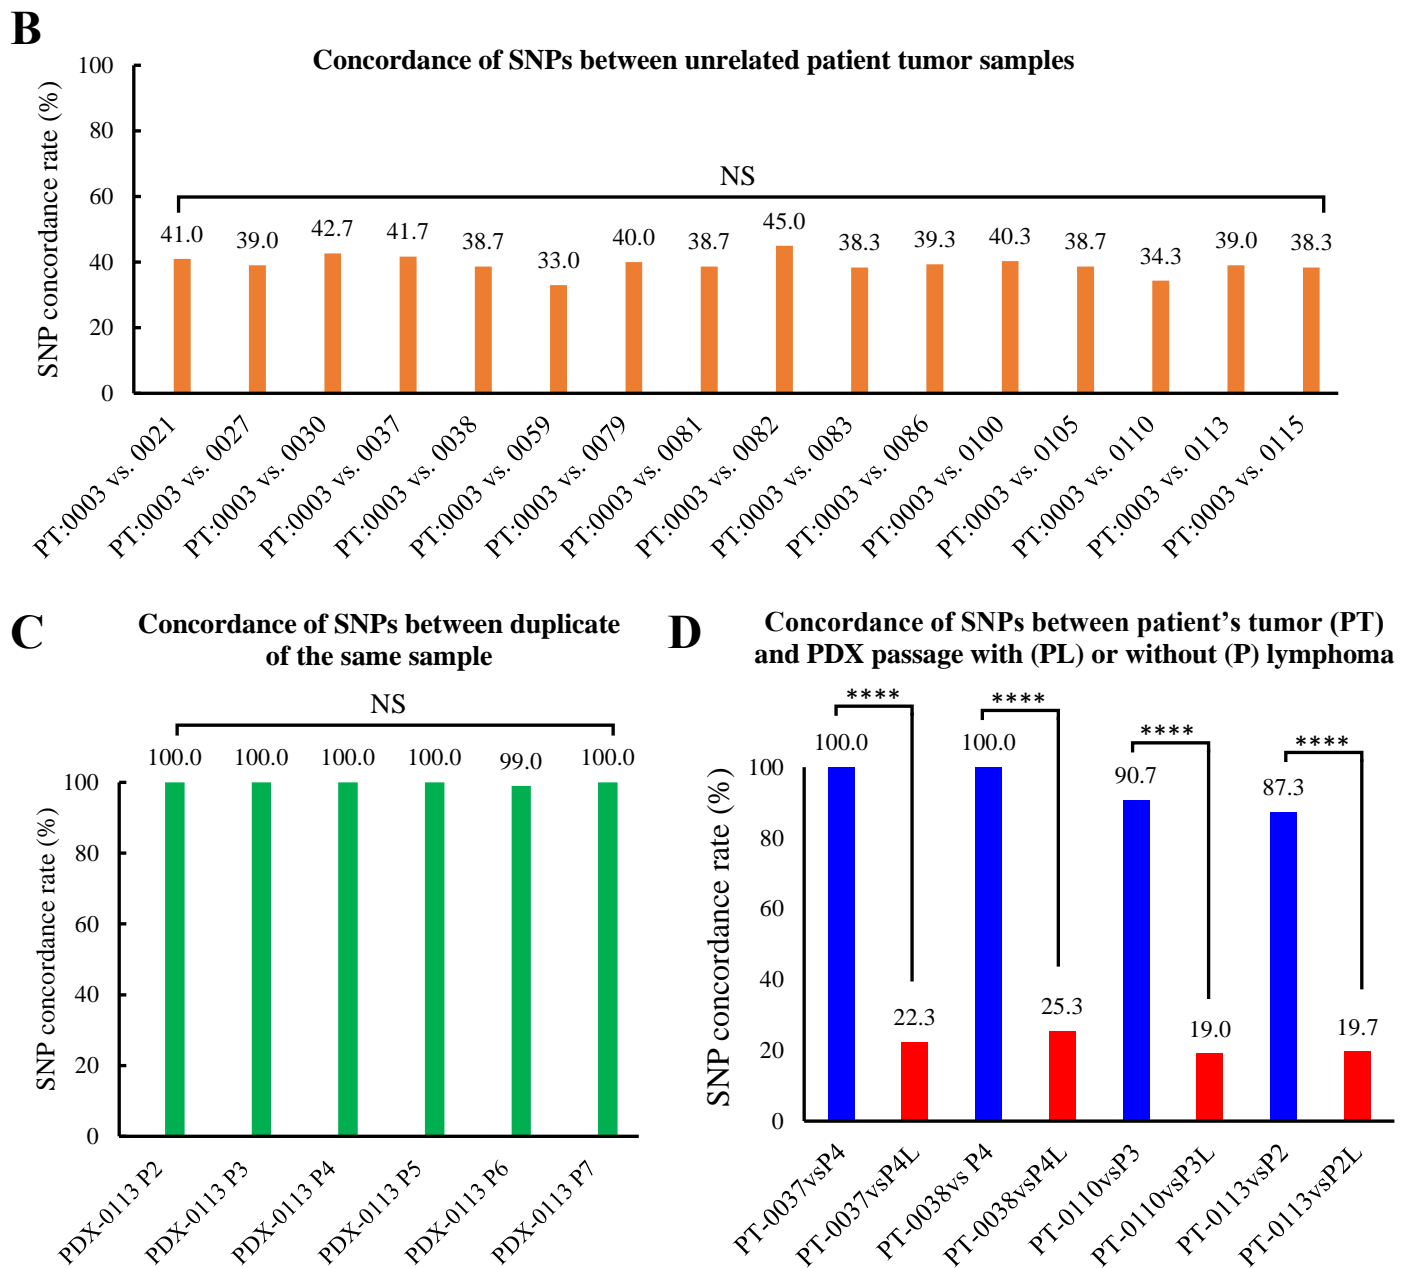

**Figure S4. Analysis of molecular landscape and genetic drift of individual ovarian PDX models throughout their derivation and serial propagation.** (A) Graphs represent SNP concordance presented as percentage of matching SNPs between original patient tumor and derivative, consecutive PDX passages. Some PDX lines show small continuous genomic evolution through passaging reflected as decrease in SNP concordance that becomes more evident in late PDX passages. (B) Analysis of SNP concordance between unrelated patient's ovarian tumors (PT). This analysis showed that unrelated tumor samples match only on 33.0% - 45.0% of SNPs. (C) Graph represents SNP concordance presented as percentage of matching SNPs between duplicates of different passages of PDX-0113. As expected, this control experiment showed that the duplicates of the same sample match on 100% of SNPs in majority of cases. (D) Graph shows an analysis of SNP concordance between patient's tumor (PT) and respective PDX passage with (PL) or without (P) lymphoma contamination. **A-D.** Statistical significance of data was assessed by one way ANOVA; NS = not significant, and \*\*\*\* =  $p < 0.0001$ .



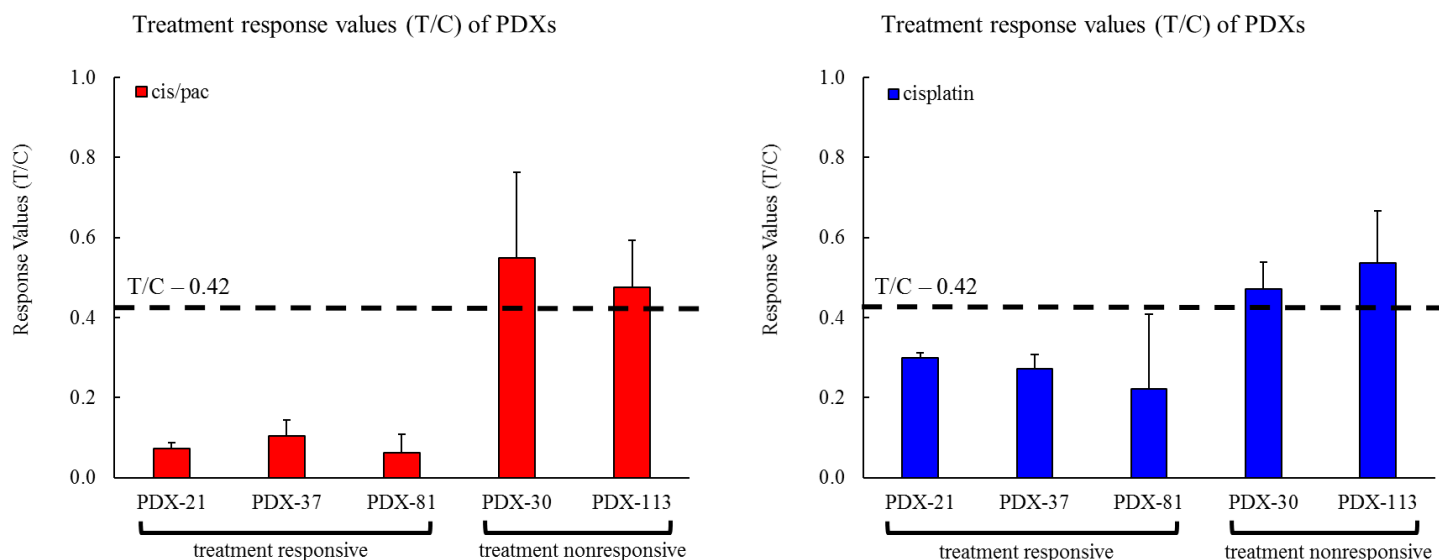

**Figure S5. Treatment response values (T/C) of PDX tumor models.** The tumor-to-control (T/C) method was used to calculate the ratio between the average volume of the treatment group and the average volume of the control group 6 weeks after treatment began (we selected 6 week time point to calculate T/C across PDXs since control group in some of the PDX models reached endpoint at this time). We adopted a previously described method for treatment response classification based on T/C values (Malcolm et. al.). The treatment response criteria assign the treatment as highly responsive ( $T/C < 0.1$ ), responsive ( $T/C 0.1-0.42$ ), or nonresponsive ( $T/C > 0.42$ ). Based on this classification, PDX-0021, PDX-0037 and PDX-0081 are responsive to cisplatin and cisplatin/paclitaxel treatment, while PDX-0030 and PDX-0113 models are nonresponsive to these therapies.

*Malcolm JE, Stearns TM, Airhart SD, Graber JH, Bult CJ: Factors that influence response classifications in chemotherapy treated patient-derived xenografts (PDX). PeerJ 2019, 7:e6586.*



**Table S1.** Clinicopathological characteristics of study patients diagnosed with high-grade serous ovarian cancer (HGSOC).

| No | PDX ID | Age | Tumor stage | First line treatment | Recurrence (months) | Platinum status | Disease status | OS (months) | BRCA status  | Successful engraftment |
|----|--------|-----|-------------|----------------------|---------------------|-----------------|----------------|-------------|--------------|------------------------|
| 1  | 0003   | 44  | IIIC        | T/C                  | 4                   | resistant       | DOD            | 47.8        | Negative     | YES                    |
| 2  | 0010   | 43  | IVB         | T/P                  | 11                  | sensitive       | DOD            | 39.0        | <i>BRCA1</i> | YES                    |
| 3  | 0021   | 75  | IIIC        | T/C                  | 8                   | sensitive       | DOD            | 18.0        | N/A          | YES                    |
| 4  | 0027   | 66  | IIIC        | T/C                  | N/A                 | sensitive       | DOC            | 12.0        | <i>BRCA2</i> | YES                    |
| 5  | 0029   | 72  | IIIC        | T/C                  | N/A                 | sensitive       | DOD            | 20.0        | N/A          | YES                    |
| 6  | 0030   | 63  | IIIC        | T/C                  | 5                   | resistant       | DOD            | 14.0        | N/A          | YES                    |
| 7  | 0032   | 59  | IIIC        | T/C                  | 7                   | sensitive       | DOD            | 30.0        | Negative     | YES                    |
| 8  | 0033   | 76  | IIIC        | T/P                  | NA                  | sensitive       | NED            | N/A         | Negative     | YES                    |
| 9  | 0037   | 54  | IIIC        | T/C                  | 8                   | sensitive       | DOD            | 44.0        | N/A          | YES                    |
| 10 | 0038   | 57  | IIIC        | T/C                  | 0                   | refractory      | DOD            | 14.0        | N/A          | YES                    |
| 11 | 0039   | 58  | IIIC        | T/C                  | NA                  | sensitive       | DOC            | 3.0         | N/A          | YES                    |
| 12 | 0054   | 56  | IIIC        | T/C                  | 5                   | resistant       | DOD            | 36.0        | Negative     | YES                    |
| 13 | 0056   | 61  | IIC         | T/P                  | NA                  | sensitive       | NED            | N/A         | <i>BRCA2</i> | NO                     |
| 14 | 0059   | 68  | IIIC        | T/C                  | 0                   | resistant       | DOD            | 16.0        | Negative     | YES                    |
| 15 | 0060   | 46  | IVB         | T/C                  | NA                  | sensitive       | NED            | N/A         | Negative     | YES                    |
| 16 | 0062   | 73  | IIIC        | T/C                  | 23                  | sensitive       | AWD            | N/A         | Negative     | YES                    |
| 17 | 0064   | 58  | IIIC        | T/C/veliparib        | 5                   | resistant       | DOD            | 31.0        | Negative     | YES                    |
| 18 | 0065   | 54  | IIIC        | T/C                  | 8                   | sensitive       | DOD            | 18.0        | N/A          | YES                    |
| 19 | 0067   | 63  | IIIC        | T/C                  | 3                   | resistant       | DOD            | 19.0        | Negative     | NO                     |
| 20 | 0070   | 71  | IVB         | T/C                  | 10                  | sensitive       | DOD            | 17.0        | Negative     | YES                    |
| 21 | 0071   | 63  | IIIC        | T/C                  | 3                   | resistant       | DOD            | 19.0        | Negative     | NO                     |
| 22 | 0073   | 55  | IVB         | T/C                  | 5                   | resistant       | DOD            | 17.0        | Negative     | NO                     |
| 23 | 0075   | 54  | IIIC        | T/C                  | 20                  | sensitive       | AWD            | N/A         | Negative     | NO                     |
| 24 | 0076   | 75  | IIIC        | T/C                  | 7                   | sensitive       | DOD            | 15.0        | Negative     | YES                    |
| 25 | 0079   | 71  | IIIC        | T/C                  | 12                  | sensitive       | DOD            | 47.0        | Negative     | YES                    |
| 26 | 0081   | 75  | IIIC        | T/C                  | 14                  | sensitive       | DOC            | 14.0        | N/A          | YES                    |
| 27 | 0082   | 72  | IIIC        | N/A                  | N/A                 | N/A             | N/A            | N/A         | N/A          | YES                    |
| 28 | 0083   | 78  | IIIC        | T/C                  | 4                   | resistant       | DOD            | 37.5        | Negative     | YES                    |
| 29 | 0086   | 67  | IIIC        | T/C                  | 3                   | resistant       | DOD            | 10.0        | N/A          | YES                    |
| 30 | 0100   | 61  | IVB         | T/C                  | 9                   | sensitive       | DOD            | 25.0        | Negative     | YES                    |
| 31 | 0105   | 49  | IVA         | T/C                  | 14                  | sensitive       | DOD            | 35.0        | Negative     | YES                    |
| 32 | 0110   | 63  | IIIC        | T/C                  | 3                   | resistant       | DOD            | 24.5        | Negative     | YES                    |
| 33 | 0113   | 58  | IIIC        | T/C                  | 3                   | resistant       | DOD            | 19.0        | Negative     | YES                    |
| 34 | 0114   | 74  | IIIC        | T/C                  | 19                  | sensitive       | DOD            | 26.0        | Negative     | NO                     |
| 35 | 0115   | 55  | IIIC        | T/C                  | 8                   | sensitive       | DOD            | 28.0        | <i>BRCA1</i> | YES                    |
| 36 | 0122   | 63  | IVB         | T/C                  | 17                  | sensitive       | AWD            | N/A         | Negative     | NO                     |
| 37 | 0137   | 75  | IIIC        | T/C                  | 7                   | sensitive       | DOD            | 28.0        | N/A          | YES                    |
| 38 | 0139   | 65  | IIIC        | T/C                  | 12                  | sensitive       | AWD            | N/A         | Negative     | NO                     |
| 39 | 0152   | 69  | IIIC        | T/C                  | 10                  | sensitive       | AWD            | N/A         | Negative     | YES                    |
| 40 | 0165   | 46  | IVA         | T/C                  | 5                   | resistant       | DOD            | 32.0        | Negative     | NO                     |
| 41 | 0193   | 61  | IVB         | T/C                  | 6                   | resistant       | DOD            | 27.0        | N/A          | YES                    |
| 42 | 0204   | 58  | IIIC        | T/C + BMI1i          | 6                   | resistant       | AWD            | N/A         | N/A          | YES                    |
| 43 | 0236   | 51  | IIIC        | T/C                  | 15                  | sensitive       | AWD            | N/A         | N/A          | NO                     |

**Abbreviations:** T/C, paclitaxel and carboplatin; T/P, paclitaxel and cisplatin; BMI1i, inhibitor of BMI1; AWD, alive with disease; NED, no evidence of disease; DOD, died of disease; DOC, died from other cause, OS overall survival, N/A indicates that the respective status is unknown.

*BRCA* mutations were detected using the Myriad MyRisk testing platform (Myriad genetics); “Negative” result indicates lack of *BRCA* mutations.



**Table S2.** Summary of engraftment rates of PDXs.

| Notes                                                                     | PDX ID   | Successful engraftment | Mouse strain | Tissue Source |
|---------------------------------------------------------------------------|----------|------------------------|--------------|---------------|
| Fully characterized PDXs expanded through multiple passages               | PDX-0003 | YES                    | NOD/scid     | Fresh         |
|                                                                           | PDX-0021 | YES                    | NRG          | Fresh         |
|                                                                           | PDX-0027 | YES                    | NSG          | Fresh         |
|                                                                           | PDX-0030 | YES                    | NSG          | Frozen/thawed |
|                                                                           | PDX-0037 | YES                    | NSG          | Fresh         |
|                                                                           | PDX-0038 | YES                    | NSG          | Frozen/thawed |
|                                                                           | PDX-0059 | YES                    | NRG          | Frozen/thawed |
|                                                                           | PDX-0079 | YES                    | NRG          | Frozen/thawed |
|                                                                           | PDX-0081 | YES                    | NRG          | Frozen/thawed |
|                                                                           | PDX-0082 | YES                    | NRG          | Frozen/thawed |
|                                                                           | PDX-0083 | YES                    | NRG          | Frozen/thawed |
|                                                                           | PDX-0086 | YES                    | NRG          | Frozen/thawed |
|                                                                           | PDX-0100 | YES                    | NOD/scid     | Frozen/thawed |
|                                                                           | PDX-0105 | YES                    | NOD/scid     | Frozen/thawed |
|                                                                           | PDX-0110 | YES                    | NOD/scid     | Frozen/thawed |
|                                                                           | PDX-0113 | YES                    | NOD/scid     | Frozen/thawed |
|                                                                           | PDX-0115 | YES                    | NOD/scid     | Frozen/thawed |
| <sup>a</sup> Slow-growing PDXs expanded for ~2 passages and cryopreserved | PDX-0029 | YES                    | NSG          | Frozen/thawed |
|                                                                           | PDX-0039 | YES                    | NSG          | Frozen/thawed |
|                                                                           | PDX-0054 | YES                    | NSG          | Frozen/thawed |
|                                                                           | PDX-0060 | YES                    | NRG          | Frozen/thawed |
|                                                                           | PDX-0064 | YES                    | NRG          | Frozen/thawed |
|                                                                           | PDX-0065 | YES                    | NRG          | Fresh         |
|                                                                           | PDX-0070 | YES                    | NRG          | Frozen/thawed |
|                                                                           | PDX-0076 | YES                    | NRG          | Frozen/thawed |
|                                                                           | PDX-0137 | YES                    | NOD/scid     | Frozen/thawed |
|                                                                           | PDX-0152 | YES                    | NOD/scid     | Fresh         |
|                                                                           | PDX-0062 | YES                    | NRG          | Frozen/thawed |
|                                                                           | PDX-0193 | YES                    | NOD/scid     | Frozen/thawed |
|                                                                           | PDX-0204 | YES                    | NOD/scid     | Fresh         |
|                                                                           | PDX-0010 | YES                    | NOD/scid     | Fresh         |
|                                                                           | PDX-0032 | YES                    | NSG          | Frozen/thawed |
|                                                                           | PDX-0033 | YES                    | NOD/scid     | Frozen/thawed |
| Primary engraftment failure                                               | PDX-0056 | NO                     | NRG          | Frozen/thawed |
|                                                                           | PDX-0067 | NO                     | NRG          | Frozen/thawed |
|                                                                           | PDX-0071 | NO                     | NRG          | Frozen/thawed |
|                                                                           | PDX-0073 | NO                     | NRG          | Frozen/thawed |
|                                                                           | PDX-0075 | NO                     | NRG          | Frozen/thawed |
|                                                                           | PDX-0114 | NO                     | NOD/scid     | Frozen/thawed |
|                                                                           | PDX-0122 | NO                     | NOD/scid     | Frozen/thawed |
|                                                                           | PDX-0139 | NO                     | NOD/scid     | Frozen/thawed |
|                                                                           | PDX-0165 | NO                     | NOD/scid     | Fresh         |
|                                                                           | PDX-0236 | NO                     | NOD/scid     | Fresh         |

<sup>a</sup>Primary tumor specimens grew in mice for at least 2 passages, however due to very slow tumor growth rate these PDXs were not expanded further.
